# Supplementary material for: Plasma Proteomic Variables Related to COVID-19 Severity: An Untargeted nLC-MS/MS Investigation
Source: Int J Mol Sci. 2023 Feb 10;24(4):3570. doi: 10.3390/ijms24043570 (PMC9962231; doi:10.3390/ijms24043570)
Supplement: Supplementary file 1 [file ijms-24-03570-s001.zip]

Archive with 6 entries (6 files):
- SUPPLEMENTARY FIGURES AND TABLES PLUS CAPTIONS_revised.pdf
- TABLE S1.xlsx
- TABLE S2.xlsx
- TABLE S4.xlsx
- TABLE S5.xlsx
- TABLE S7.xlsx
