# Supplementary material for: Plasma Proteomic Variables Related to COVID-19 Severity: An Untargeted nLC-MS/MS Investigation
Source: Int J Mol Sci. 2023 Feb 10;24(4):3570. doi: 10.3390/ijms24043570 (PMC9962231; doi:10.3390/ijms24043570)
Supplement: Supplementary file 1 [file ijms-24-03570-s001.zip › TABLE S1.xlsx]

## Sheet: caption of table S1
Table S1: List of the identified proteins. List of the proteins identified in the 43 patients considered in the analysis. Protein IDs highlighted in blue were also selected after a filtration and quantified as described in Materials & Methods. -10lgP = significance score obtained from the identification analysis of the all enrolled patients; #peptides = n° of significant peptides (p-value < 0.05;…

## Sheet: Suppl Table 1
Accession	Protein name	-10lgP	#Peptides	#Unique	Average coverage (%)	Average coverage in MILDs (%)	Average coverage in SEVEREs (%)	Average spectra	PTM	Avg. Mass	Description
P02768	ALBU_HUMAN	925.11	140	140	87.6279	87.9091	86.7	1127.74	Carbamidomethylation; Oxidation (M); Deamidation only N	69367	Serum albumin OS=Homo sapiens GN=ALB PE=1 SV=2
P01024	CO3_HUMAN	828.84	166	166	46.6512	46.4242	47.4	230.163	Carbamidomethylation; Oxidation (M); Deamidation only N	187147	Complement C3 OS=Homo sapiens GN=C3 PE=1 SV=2
P02787	TRFE_HUMAN	824.76	116	116	75.5581	76.303	73.1	312.488	Carbamidomethylation; Oxidation (M); Deamidation only N	77064	Serotransferrin OS=Homo sapiens GN=TF PE=1 SV=3
P02751	FINC_HUMAN	821.68	131	131	28.6977	29.1515	27.2	129.349	Carbamidomethylation; Oxidation (M); Deamidation only N	262622	Fibronectin OS=Homo sapiens GN=FN1 PE=1 SV=4
P08603	CFAH_HUMAN	816.19	134	116	61.1395	61.303	60.6	217.419	Carbamidomethylation; Oxidation (M); Deamidation only N	139096	Complement factor H OS=Homo sapiens GN=CFH PE=1 SV=4
P02671	FIBA_HUMAN	762.03	83	83	50.7442	50.5455	51.4	323.488	Carbamidomethylation; Oxidation (M); Deamidation only N	94973	Fibrinogen alpha chain OS=Homo sapiens GN=FGA PE=1 SV=2
P0C0L4	CO4A_HUMAN	758.73	119	2	33.8837	33.6061	34.8	130.651	Carbamidomethylation; Oxidation (M); Deamidation only N	192770	Complement C4-A OS=Homo sapiens GN=C4A PE=1 SV=1
P0C0L5	CO4B_HUMAN	758.36	118	1	33.8372	33.6364	34.5	130.442	Carbamidomethylation; Oxidation (M); Deamidation only N	192792	Complement C4-B OS=Homo sapiens GN=C4B PE=1 SV=1
P01023	A2MG_HUMAN	732.9	104	94	37.3256	37.2727	37.5	136.349	Carbamidomethylation; Oxidation (M); Deamidation only N	163290	Alpha-2-macroglobulin OS=Homo sapiens GN=A2M PE=1 SV=3
P04114	APOB_HUMAN	732.43	183	183	14.7442	14.4848	15.6	120	Carbamidomethylation; Oxidation (M); Deamidation only N	515611	Apolipoprotein B-100 OS=Homo sapiens GN=APOB PE=1 SV=2
P02675	FIBB_HUMAN	731.75	77	77	77.2791	77.2121	77.5	276.814	Carbamidomethylation; Oxidation (M); Deamidation only N	55928	Fibrinogen beta chain OS=Homo sapiens GN=FGB PE=1 SV=2
P00747	PLMN_HUMAN	718.12	80	80	47.3256	47.5758	46.5	106.209	Carbamidomethylation; Oxidation (M); Deamidation only N	90569	Plasminogen OS=Homo sapiens GN=PLG PE=1 SV=2
P00738	HPT_HUMAN	697.61	60	35	68.3721	68.4242	68.2	210.814	Carbamidomethylation; Oxidation (M); Deamidation only N	45205	Haptoglobin OS=Homo sapiens GN=HP PE=1 SV=1
P02774	VTDB_HUMAN	694.21	65	65	64.5116	66.1212	59.2	107	Carbamidomethylation; Oxidation (M); Deamidation only N	52964	Vitamin D-binding protein OS=Homo sapiens GN=GC PE=1 SV=1
P02749	APOH_HUMAN	680.04	38	38	64.186	64.7879	62.2	76.5814	Carbamidomethylation; Oxidation (M); Deamidation only N	38298	Beta-2-glycoprotein 1 OS=Homo sapiens GN=APOH PE=1 SV=3
Q9Y490	TLN1_HUMAN	673.81	94	86	15.7209	16.3333	13.7	45.6279	Carbamidomethylation; Oxidation (M); Deamidation only N	269765	Talin-1 OS=Homo sapiens GN=TLN1 PE=1 SV=3
P21333	FLNA_HUMAN	668.71	73	72	12.5116	13.6667	8.7	39.2326	Carbamidomethylation; Deamidation only N	280737	Filamin-A OS=Homo sapiens GN=FLNA PE=1 SV=4
P02679	FIBG_HUMAN	661.81	48	48	45.8837	45.2727	47.9	89.8605	Carbamidomethylation; Oxidation (M); Deamidation only N	51512	Fibrinogen gamma chain OS=Homo sapiens GN=FGG PE=1 SV=3
P01857	IGHG1_HUMAN	659.28	39	23	70.3256	71.6061	66.1	139.488	Carbamidomethylation; Oxidation (M); Deamidation only N	36106	Ig gamma-1 chain C region OS=Homo sapiens GN=IGHG1 PE=1 SV=1
P01860	IGHG3_HUMAN	639	44	24	51.907	53.0303	48.2	114.512	Carbamidomethylation; Oxidation (M); Deamidation only N	41287	Ig gamma-3 chain C region OS=Homo sapiens GN=IGHG3 PE=1 SV=2
P00450	CERU_HUMAN	627.05	64	64	30.4186	29.7879	32.5	75.2558	Carbamidomethylation; Oxidation (M); Deamidation only N	122205	Ceruloplasmin OS=Homo sapiens GN=CP PE=1 SV=1
P01876	IGHA1_HUMAN	626.24	39	19	69	68.6667	70.1	140.884	Carbamidomethylation; Oxidation (M); Deamidation only N	37655	Ig alpha-1 chain C region OS=Homo sapiens GN=IGHA1 PE=1 SV=2
P01859	IGHG2_HUMAN	621.02	34	20	61.7907	61.5152	62.7	127.674	Carbamidomethylation; Oxidation (M); Deamidation only N	35901	Ig gamma-2 chain C region OS=Homo sapiens GN=IGHG2 PE=1 SV=2
P01871	IGHM_HUMAN	618.09	46	26	54.9302	53.2121	60.6	86.3488	Carbamidomethylation; Oxidation (M); Deamidation only N	49307	Ig mu chain C region OS=Homo sapiens GN=IGHM PE=1 SV=3
P01042	KNG1_HUMAN	617.65	61	61	34.9767	34.4545	36.7	52.2093	Carbamidomethylation; Oxidation (M); Deamidation only N	71957	Kininogen-1 OS=Homo sapiens GN=KNG1 PE=1 SV=2
P00751	CFAB_HUMAN	617.29	62	62	38.6744	39.4545	36.1	71.6279	Carbamidomethylation; Deamidation only N	85533	Complement factor B OS=Homo sapiens GN=CFB PE=1 SV=2
P02790	HEMO_HUMAN	612.99	42	42	47.6744	46.8485	50.4	82.186	Carbamidomethylation; Oxidation (M); Deamidation only N	51676	Hemopexin OS=Homo sapiens GN=HPX PE=1 SV=2
P01834	IGKC_HUMAN	612.85	18	18	90.7674	90.8485	90.5	156.558	Carbamidomethylation; Deamidation only N	11609	Ig kappa chain C region OS=Homo sapiens GN=IGKC PE=1 SV=1
P00734	THRB_HUMAN	603.01	49	49	39.9302	39.5455	41.2	61.6744	Carbamidomethylation; Oxidation (M); Deamidation only N	70037	Prothrombin OS=Homo sapiens GN=F2 PE=1 SV=2
P01861	IGHG4_HUMAN	602.55	34	25	62.7442	63.7576	59.4	81.6047	Carbamidomethylation; Oxidation (M); Deamidation only N	35941	Ig gamma-4 chain C region OS=Homo sapiens GN=IGHG4 PE=1 SV=1
P02647	APOA1_HUMAN	593.77	49	49	63.6047	65.0909	58.7	72.5116	Oxidation (M); Deamidation only N	30778	Apolipoprotein A-I OS=Homo sapiens GN=APOA1 PE=1 SV=1
Q14624	ITIH4_HUMAN	593.73	59	59	27.4419	26.5455	30.4	48.2093	Carbamidomethylation; Oxidation (M); Deamidation only N	103357	Inter-alpha-trypsin inhibitor heavy chain H4 OS=Homo sapiens GN=ITIH4 PE=1 SV=4
P02765	FETUA_HUMAN	588.06	33	33	51.7674	53.2121	47	66.5581	Carbamidomethylation; Oxidation (M); Deamidation only N	39325	Alpha-2-HS-glycoprotein OS=Homo sapiens GN=AHSG PE=1 SV=1
P35579	MYH9_HUMAN	582.06	79	73	9.72093	10.3636	7.6	25.907	Carbamidomethylation; Oxidation (M); Deamidation only N	226530	Myosin-9 OS=Homo sapiens GN=MYH9 PE=1 SV=4
O43866	CD5L_HUMAN	580.31	28	28	49.3953	49.3636	49.5	30.7907	Carbamidomethylation; Deamidation only N	38088	CD5 antigen-like OS=Homo sapiens GN=CD5L PE=1 SV=1
P04217	A1BG_HUMAN	575.96	42	42	56.2791	56.2424	56.4	61.8372	Carbamidomethylation; Oxidation (M); Deamidation only N	54254	Alpha-1B-glycoprotein OS=Homo sapiens GN=A1BG PE=1 SV=4
P06396	GELS_HUMAN	575.6	42	42	28.4419	30.3939	22	33.9302	Carbamidomethylation; Deamidation only N	85697	Gelsolin OS=Homo sapiens GN=GSN PE=1 SV=1
P63261	ACTG_HUMAN	569.71	27	11	37.7442	38.4545	35.4	39.1395	Carbamidomethylation; Oxidation (M); Deamidation only N	41793	Actin cytoplasmic 2 OS=Homo sapiens GN=ACTG1 PE=1 SV=1
P60709	ACTB_HUMAN	569.71	27	11	37.7442	38.4545	35.4	39.1395	Carbamidomethylation; Oxidation (M); Deamidation only N	41737	Actin cytoplasmic 1 OS=Homo sapiens GN=ACTB PE=1 SV=1
P01877	IGHA2_HUMAN	566.95	32	12	65.814	64.8788	68.9	96.0698	Carbamidomethylation; Oxidation (M); Deamidation only N	36526	Ig alpha-2 chain C region OS=Homo sapiens GN=IGHA2 PE=1 SV=3
P02748	CO9_HUMAN	566.62	36	36	29.3953	29.303	29.7	33.0233	Carbamidomethylation; Oxidation (M); Deamidation only N	63173	Complement component C9 OS=Homo sapiens GN=C9 PE=1 SV=2
P04275	VWF_HUMAN	561.87	68	68	5.60465	4.21212	10.2	16.6279	Carbamidomethylation; Oxidation (M); Deamidation only N	309262	von Willebrand factor OS=Homo sapiens GN=VWF PE=1 SV=4
P01591	IGJ_HUMAN	560.3	25	25	65.3488	64.9394	66.7	24.7209	Carbamidomethylation; Oxidation (M); Deamidation only N	18099	Immunoglobulin J chain OS=Homo sapiens GN=IGJ PE=1 SV=4
P01009	A1AT_HUMAN	559.59	41	41	37.8837	37.0303	40.7	52.4186	Carbamidomethylation; Oxidation (M); Deamidation only N	46737	Alpha-1-antitrypsin OS=Homo sapiens GN=SERPINA1 PE=1 SV=3
P04003	C4BPA_HUMAN	549.42	42	42	41.3721	40.7576	43.4	58.0233	Carbamidomethylation; Oxidation (M); Deamidation only N	67033	C4b-binding protein alpha chain OS=Homo sapiens GN=C4BPA PE=1 SV=2
P01008	ANT3_HUMAN	546.19	35	35	36.2326	36.9091	34	40.5581	Carbamidomethylation; Oxidation (M); Deamidation only N	52602	Antithrombin-III OS=Homo sapiens GN=SERPINC1 PE=1 SV=1
P07996	TSP1_HUMAN	546.05	41	41	16.4186	16.697	15.5	35.6977	Carbamidomethylation; Oxidation (M); Deamidation only N	129383	Thrombospondin-1 OS=Homo sapiens GN=THBS1 PE=1 SV=2
P00739	HPTR_HUMAN	545.43	32	7	50.5814	50.7576	50	66.9302	Carbamidomethylation; Oxidation (M); Deamidation only N	39030	Haptoglobin-related protein OS=Homo sapiens GN=HPR PE=2 SV=2
P19823	ITIH2_HUMAN	541.54	40	40	20.4186	20.6061	19.8	46.093	Carbamidomethylation; Oxidation (M); Deamidation only N	106463	Inter-alpha-trypsin inhibitor heavy chain H2 OS=Homo sapiens GN=ITIH2 PE=1 SV=2
Q03591	FHR1_HUMAN	535.03	23	5	42.2326	42.6667	40.8	32.3256	Carbamidomethylation; Oxidation (M); Deamidation only N	37651	Complement factor H-related protein 1 OS=Homo sapiens GN=CFHR1 PE=1 SV=2
P10643	CO7_HUMAN	534.46	35	35	19.3953	19.0909	20.4	25.8837	Carbamidomethylation; Oxidation (M); Deamidation only N	93518	Complement component C7 OS=Homo sapiens GN=C7 PE=1 SV=2
P06727	APOA4_HUMAN	529.38	54	54	45.2093	47.8485	36.5	38.5116	Oxidation (M); Deamidation only N	45399	Apolipoprotein A-IV OS=Homo sapiens GN=APOA4 PE=1 SV=3
P25311	ZA2G_HUMAN	528.96	34	34	51.3488	50.697	53.5	38.3256	Carbamidomethylation; Oxidation (M); Deamidation only N	34259	Zinc-alpha-2-glycoprotein OS=Homo sapiens GN=AZGP1 PE=1 SV=2
P13671	CO6_HUMAN	528.21	43	43	23.9535	23.697	24.8	31.9302	Carbamidomethylation; Oxidation (M); Deamidation only N	104786	Complement component C6 OS=Homo sapiens GN=C6 PE=1 SV=3
P04004	VTNC_HUMAN	523.52	28	28	31.3488	30.5455	34	37.3488	Carbamidomethylation; Oxidation (M); Deamidation only N	54306	Vitronectin OS=Homo sapiens GN=VTN PE=1 SV=1
P08519	APOA_HUMAN	513.51	47	47	3	3.06061	2.8	22.5349	Carbamidomethylation; Oxidation (M); Deamidation only N	501323	Apolipoprotein(a) OS=Homo sapiens GN=LPA PE=1 SV=1
P04220	MUCB_HUMAN	512.72	25	5	36.6977	35.7273	39.9	44.6744	Carbamidomethylation; Oxidation (M); Deamidation only N	43057	Ig mu heavy chain disease protein OS=Homo sapiens PE=1 SV=1
P43652	AFAM_HUMAN	505.89	43	43	27.186	27.5758	25.9	32.2326	Carbamidomethylation; Oxidation (M); Deamidation only N	69069	Afamin OS=Homo sapiens GN=AFM PE=1 SV=1
P07357	CO8A_HUMAN	503.53	30	30	28.2093	28.303	27.9	28.1628	Carbamidomethylation; Oxidation (M); Deamidation only N	65163	Complement component C8 alpha chain OS=Homo sapiens GN=C8A PE=1 SV=2
P10909	CLUS_HUMAN	494.05	31	31	29.7442	29.3333	31.1	44.186	Carbamidomethylation; Oxidation (M); Deamidation only N	52495	Clusterin OS=Homo sapiens GN=CLU PE=1 SV=1
P0CG05	LAC2_HUMAN	489.19	17	5	86.6744	86.5758	87	111.651	Carbamidomethylation; Deamidation only N	11294	Ig lambda-2 chain C regions OS=Homo sapiens GN=IGLC2 PE=1 SV=1
P02760	AMBP_HUMAN	489.1	33	33	33.0698	32.9697	33.4	33.0465	Carbamidomethylation; Oxidation (M); Deamidation only N	39000	Protein AMBP OS=Homo sapiens GN=AMBP PE=1 SV=1
P05156	CFAI_HUMAN	488.03	27	27	19.6512	18.4545	23.6	20.5814	Carbamidomethylation; Deamidation only N	65750	Complement factor I OS=Homo sapiens GN=CFI PE=1 SV=2
P09871	C1S_HUMAN	486.57	25	25	19.814	19.5152	20.8	18.4651	Carbamidomethylation; Oxidation (M); Deamidation only N	76685	Complement C1s subcomponent OS=Homo sapiens GN=C1S PE=1 SV=1
P19827	ITIH1_HUMAN	483.5	24	24	13.6512	13.4545	14.3	19.6047	Carbamidomethylation; Oxidation (M); Deamidation only N	101389	Inter-alpha-trypsin inhibitor heavy chain H1 OS=Homo sapiens GN=ITIH1 PE=1 SV=3
P01011	AACT_HUMAN	479.83	27	27	23.0698	21.4242	28.5	30.6977	Oxidation (M); Deamidation only N	47651	Alpha-1-antichymotrypsin OS=Homo sapiens GN=SERPINA3 PE=1 SV=2
P07358	CO8B_HUMAN	479.45	23	23	21.6977	21.9697	20.8	24.4884	Carbamidomethylation; Oxidation (M); Deamidation only N	67047	Complement component C8 beta chain OS=Homo sapiens GN=C8B PE=1 SV=3
P69905	HBA_HUMAN	479.4	14	14	47.6512	48.7273	44.1	37.8605	Oxidation (M); Deamidation only N	15258	Hemoglobin subunit alpha OS=Homo sapiens GN=HBA1 PE=1 SV=2
P62736	ACTA_HUMAN	471.91	17	2	19.8605	20.0303	19.3	30.7209	Carbamidomethylation; Oxidation (M); Deamidation only N	42009	Actin aortic smooth muscle OS=Homo sapiens GN=ACTA2 PE=1 SV=1
P68032	ACTC_HUMAN	471.91	17	2	19.8605	20.0303	19.3	30.7209	Carbamidomethylation; Oxidation (M); Deamidation only N	42019	Actin alpha cardiac muscle 1 OS=Homo sapiens GN=ACTC1 PE=1 SV=1
P63267	ACTH_HUMAN	471.91	17	2	19.8837	20.0303	19.4	30.7209	Carbamidomethylation; Oxidation (M); Deamidation only N	41877	Actin gamma-enteric smooth muscle OS=Homo sapiens GN=ACTG2 PE=1 SV=1
P68871	HBB_HUMAN	468.22	17	11	52.4186	53.7576	48	37.0698	Oxidation (M); Deamidation only N	15998	Hemoglobin subunit beta OS=Homo sapiens GN=HBB PE=1 SV=2
P04196	HRG_HUMAN	467.05	31	31	23.6744	24.7576	20.1	25.093	Carbamidomethylation; Oxidation (M); Deamidation only N	59578	Histidine-rich glycoprotein OS=Homo sapiens GN=HRG PE=1 SV=1
P68133	ACTS_HUMAN	466.24	16	1	19.6977	20.2727	17.8	30.6744	Carbamidomethylation; Oxidation (M); Deamidation only N	42051	Actin alpha skeletal muscle OS=Homo sapiens GN=ACTA1 PE=1 SV=1
Q96PD5	PGRP2_HUMAN	463.81	22	22	16.5581	17.8485	12.3	11.6279	Carbamidomethylation; Deamidation only N	62217	N-acetylmuramoyl-L-alanine amidase OS=Homo sapiens GN=PGLYRP2 PE=1 SV=1
P00736	C1R_HUMAN	458.42	33	32	20.1395	19.3939	22.6	19.2093	Carbamidomethylation; Oxidation (M); Deamidation only N	80119	Complement C1r subcomponent OS=Homo sapiens GN=C1R PE=1 SV=2
B9A064	IGLL5_HUMAN	456.1	16	7	42.2093	41.4545	44.7	78.4186	Carbamidomethylation; Deamidation only N	23063	Immunoglobulin lambda-like polypeptide 5 OS=Homo sapiens GN=IGLL5 PE=2 SV=2
P05106	ITB3_HUMAN	451.7	25	25	15.9535	17.5455	10.7	14.3953	Carbamidomethylation; Deamidation only N	87058	Integrin beta-3 OS=Homo sapiens GN=ITGB3 PE=1 SV=2
P01031	CO5_HUMAN	451.51	26	26	7.27907	7.0303	8.1	18.9535	Carbamidomethylation; Oxidation (M); Deamidation only N	188304	Complement C5 OS=Homo sapiens GN=C5 PE=1 SV=4
P02766	TTHY_HUMAN	449.5	14	14	49.2093	50	46.6	13.4651	Deamidation only N	15887	Transthyretin OS=Homo sapiens GN=TTR PE=1 SV=1
P00748	FA12_HUMAN	449.4	25	25	17.1628	17.1515	17.2	14.9767	Carbamidomethylation; Oxidation (M); Deamidation only N	67792	Coagulation factor XII OS=Homo sapiens GN=F12 PE=1 SV=3
P02753	RET4_HUMAN	443.51	19	19	39.2093	39.0303	39.8	13.6744	Carbamidomethylation; Oxidation (M); Deamidation only N	23010	Retinol-binding protein 4 OS=Homo sapiens GN=RBP4 PE=1 SV=3
P0CG06	LAC3_HUMAN	438.89	12	4	81.5349	81.2727	82.4	100.674	Carbamidomethylation; Deamidation only N	11237	Ig lambda-3 chain C regions OS=Homo sapiens GN=IGLC3 PE=1 SV=1
P05090	APOD_HUMAN	436.92	20	20	44.1628	43.9394	44.9	38.9535	Carbamidomethylation; Oxidation (M); Deamidation only N	21276	Apolipoprotein D OS=Homo sapiens GN=APOD PE=1 SV=1
P03952	KLKB1_HUMAN	436.82	24	24	19.8605	20.0606	19.2	19.3721	Carbamidomethylation; Oxidation (M); Deamidation only N	71370	Plasma kallikrein OS=Homo sapiens GN=KLKB1 PE=1 SV=1
P07225	PROS_HUMAN	435.63	26	26	18.186	17.9394	19	17.9535	Carbamidomethylation; Oxidation (M); Deamidation only N	75123	Vitamin K-dependent protein S OS=Homo sapiens GN=PROS1 PE=1 SV=1
P23142	FBLN1_HUMAN	430.4	25	25	19.3256	19.5152	18.7	14.907	Carbamidomethylation; Oxidation (M); Deamidation only N	77214	Fibulin-1 OS=Homo sapiens GN=FBLN1 PE=1 SV=4
P02763	A1AG1_HUMAN	424.25	23	17	32.3721	31.1818	36.3	24.3721	Carbamidomethylation; Deamidation only N	23512	Alpha-1-acid glycoprotein 1 OS=Homo sapiens GN=ORM1 PE=1 SV=1
P02652	APOA2_HUMAN	420.92	15	15	62.0233	66.697	46.6	19.2326	Carbamidomethylation; Oxidation (M)	11175	Apolipoprotein A-II OS=Homo sapiens GN=APOA2 PE=1 SV=1
Q06033	ITIH3_HUMAN	416.68	26	26	9.72093	8.48485	13.8	11.7209	Oxidation (M); Deamidation only N	99849	Inter-alpha-trypsin inhibitor heavy chain H3 OS=Homo sapiens GN=ITIH3 PE=1 SV=2
P02649	APOE_HUMAN	415.19	32	32	37.4651	37.1818	38.4	25.6512	Carbamidomethylation; Oxidation (M); Deamidation only N	36154	Apolipoprotein E OS=Homo sapiens GN=APOE PE=1 SV=1
P08697	A2AP_HUMAN	413.76	21	21	19.3023	19.0606	20.1	15.9767	Carbamidomethylation; Oxidation (M); Deamidation only N	54566	Alpha-2-antiplasmin OS=Homo sapiens GN=SERPINF2 PE=1 SV=3
P06681	CO2_HUMAN	410.32	22	22	10.907	10.5152	12.2	9.7907	Carbamidomethylation; Deamidation only N	83268	Complement C2 OS=Homo sapiens GN=C2 PE=1 SV=2
P27169	PON1_HUMAN	391.62	15	15	19.6512	19.8182	19.1	11.2326	Carbamidomethylation; Deamidation only N	39731	Serum paraoxonase/arylesterase 1 OS=Homo sapiens GN=PON1 PE=1 SV=3
P05155	IC1_HUMAN	386.51	19	19	11.4651	11.1818	12.4	10.0465	Carbamidomethylation; Deamidation only N	55154	Plasma protease C1 inhibitor OS=Homo sapiens GN=SERPING1 PE=1 SV=2
Q14520	HABP2_HUMAN	386.4	16	16	16.5349	16.8788	15.4	15.4651	Carbamidomethylation; Deamidation only N	62672	Hyaluronan-binding protein 2 OS=Homo sapiens GN=HABP2 PE=1 SV=1
P02750	A2GL_HUMAN	383.13	20	20	25.0465	24.5152	26.8	13.093	Carbamidomethylation; Deamidation only N	38178	Leucine-rich alpha-2-glycoprotein OS=Homo sapiens GN=LRG1 PE=1 SV=2
P02042	HBD_HUMAN	380.13	14	8	38.6047	39.0909	37	15	Oxidation (M); Deamidation only N	16055	Hemoglobin subunit delta OS=Homo sapiens GN=HBD PE=1 SV=2
A0M8Q6	LAC7_HUMAN	375.78	11	6	58.9767	59.2121	58.2	51.7209	Carbamidomethylation; Deamidation only N	11303	Ig lambda-7 chain C region OS=Homo sapiens GN=IGLC7 PE=1 SV=2
P05160	F13B_HUMAN	375.19	16	16	12.9302	13.0303	12.6	10.3488	Carbamidomethylation; Deamidation only N	75511	Coagulation factor XIII B chain OS=Homo sapiens GN=F13B PE=1 SV=3
P67936	TPM4_HUMAN	374.54	17	8	18.8605	18.9697	18.5	8.16279		28522	Tropomyosin alpha-4 chain OS=Homo sapiens GN=TPM4 PE=1 SV=3
Q08380	LG3BP_HUMAN	374.14	16	16	9.23256	7.69697	14.3	5.2093	Carbamidomethylation; Oxidation (M); Deamidation only N	65331	Galectin-3-binding protein OS=Homo sapiens GN=LGALS3BP PE=1 SV=1
P02735	SAA_HUMAN	371.7	11	11	38.6279	31.9091	60.8	15.3256	Oxidation (M); Deamidation only N	13532	Serum amyloid A protein OS=Homo sapiens GN=SAA1 PE=1 SV=2
O75882	ATRN_HUMAN	370.97	17	17	6.81395	6.72727	7.1	11.5581	Carbamidomethylation; Oxidation (M); Deamidation only N	158536	Attractin OS=Homo sapiens GN=ATRN PE=1 SV=2
P36955	PEDF_HUMAN	369.54	20	20	16.3023	16.1515	16.8	9.81395	Carbamidomethylation; Deamidation only N	46312	Pigment epithelium-derived factor OS=Homo sapiens GN=SERPINF1 PE=1 SV=4
P0CF74	LAC6_HUMAN	369.11	8	1	56.6512	57.2424	54.7	64.7674	Carbamidomethylation; Deamidation only N	11277	Ig lambda-6 chain C region OS=Homo sapiens GN=IGLC6 PE=4 SV=1
Q6S8J3	POTEE_HUMAN	368.42	10	2	5.39535	5.57576	4.8	14.5581	Carbamidomethylation; Oxidation (M); Deamidation only N	121363	POTE ankyrin domain family member E OS=Homo sapiens GN=POTEE PE=1 SV=3
P19652	A1AG2_HUMAN	368.03	19	13	27.5581	24.1818	38.7	15.7907	Carbamidomethylation; Oxidation (M); Deamidation only N	23603	Alpha-1-acid glycoprotein 2 OS=Homo sapiens GN=ORM2 PE=1 SV=2
Q14766	LTBP1_HUMAN	367.64	18	18	2.7907	2.87879	2.5	4.83721	Carbamidomethylation	186795	Latent-transforming growth factor beta-binding protein 1 OS=Homo sapiens GN=LTBP1 PE=1 SV=4
P02655	APOC2_HUMAN	365.7	11	11	36.6512	38.7273	29.8	5.95349	Oxidation (M)	11284	Apolipoprotein C-II OS=Homo sapiens GN=APOC2 PE=1 SV=1
Q12805	FBLN3_HUMAN	363.11	14	14	16.7209	17.1818	15.2	8.76744	Carbamidomethylation; Oxidation (M); Deamidation only N	54641	EGF-containing fibulin-like extracellular matrix protein 1 OS=Homo sapiens GN=EFEMP1 PE=1 SV=2
P02656	APOC3_HUMAN	356.98	10	10	36.2558	37.4545	32.3	17.7674		10852	Apolipoprotein C-III OS=Homo sapiens GN=APOC3 PE=1 SV=1
P35527	K1C9_HUMAN	354.58	12	12	2.72093	2.15152	4.6	1.16279	Oxidation (M)	62064	Keratin type I cytoskeletal 9 OS=Homo sapiens GN=KRT9 PE=1 SV=3
Q15942	ZYX_HUMAN	353.86	13	13	13.0233	13.9394	10	8.5814	Carbamidomethylation; Deamidation only N	61277	Zyxin OS=Homo sapiens GN=ZYX PE=1 SV=1
P27918	PROP_HUMAN	349.01	16	16	11.3023	12.1212	8.6	7.04651	Carbamidomethylation; Deamidation only N	51276	Properdin OS=Homo sapiens GN=CFP PE=1 SV=2
P02743	SAMP_HUMAN	344.88	13	13	11.3023	9.93939	15.8	4.81395	Carbamidomethylation; Deamidation only N	25387	Serum amyloid P-component OS=Homo sapiens GN=APCS PE=1 SV=2
P01623	KV305_HUMAN	344.63	8	1	53.2093	52.1818	56.6	22.907	Carbamidomethylation	11746	Ig kappa chain V-III region WOL OS=Homo sapiens PE=1 SV=1
P08514	ITA2B_HUMAN	344.38	17	17	4.62791	4.93939	3.6	5.60465	Carbamidomethylation; Deamidation only N	113377	Integrin alpha-IIb OS=Homo sapiens GN=ITGA2B PE=1 SV=3
O95445	APOM_HUMAN	340.11	10	10	22.2791	21.7879	23.9	9.48837	Carbamidomethylation; Deamidation only N	21253	Apolipoprotein M OS=Homo sapiens GN=APOM PE=1 SV=2
P30101	PDIA3_HUMAN	334.15	11	11	8.16279	8.39394	7.4	5.32558	Carbamidomethylation; Deamidation only N	56782	Protein disulfide-isomerase A3 OS=Homo sapiens GN=PDIA3 PE=1 SV=4
O00151	PDLI1_HUMAN	334.14	9	9	17.9302	19.5455	12.6	5.83721	Carbamidomethylation; Oxidation (M); Deamidation only N	36072	PDZ and LIM domain protein 1 OS=Homo sapiens GN=PDLIM1 PE=1 SV=4
P12259	FA5_HUMAN	333.55	19	19	2.11628	1.78788	3.2	3.55814	Deamidation only N	251701	Coagulation factor V OS=Homo sapiens GN=F5 PE=1 SV=4
Q16610	ECM1_HUMAN	333.18	14	14	10.8372	11.4545	8.8	5.09302	Carbamidomethylation; Deamidation only N	60674	Extracellular matrix protein 1 OS=Homo sapiens GN=ECM1 PE=1 SV=2
Q9Y6R7	FCGBP_HUMAN	333.04	14	14	0.534884	0.545455	0.5	4.25581	Carbamidomethylation; Deamidation only N	572021	IgGFc-binding protein OS=Homo sapiens GN=FCGBP PE=1 SV=3
O14791	APOL1_HUMAN	331.74	8	8	10.8837	11.1515	10	8	Deamidation only N	43974	Apolipoprotein L1 OS=Homo sapiens GN=APOL1 PE=1 SV=5
P04206	KV307_HUMAN	330.04	7	2	44	44.303	43	20.2791	Carbamidomethylation	11830	Ig kappa chain V-III region GOL OS=Homo sapiens PE=1 SV=1
P05546	HEP2_HUMAN	325.92	16	16	6.90698	6.63636	7.8	5.69767	Deamidation only N	57071	Heparin cofactor 2 OS=Homo sapiens GN=SERPIND1 PE=1 SV=3
P20742	PZP_HUMAN	323.2	21	11	3.62791	3.60606	3.7	8.04651	Carbamidomethylation; Oxidation (M); Deamidation only N	163862	Pregnancy zone protein OS=Homo sapiens GN=PZP PE=1 SV=4
P04075	ALDOA_HUMAN	322.97	11	10	11.1628	12.0303	8.3	4.67442	Carbamidomethylation; Oxidation (M); Deamidation only N	39420	Fructose-bisphosphate aldolase A OS=Homo sapiens GN=ALDOA PE=1 SV=2
Q02985	FHR3_HUMAN	322.36	10	3	9.18605	9.48485	8.2	11.4651	Carbamidomethylation; Deamidation only N	37323	Complement factor H-related protein 3 OS=Homo sapiens GN=CFHR3 PE=1 SV=2
P01620	KV302_HUMAN	321.38	6	1	51.5349	51.4242	51.9	21.2791	Carbamidomethylation	11775	Ig kappa chain V-III region SIE OS=Homo sapiens PE=1 SV=1
Q13201	MMRN1_HUMAN	321.12	12	12	2.93023	2.90909	3	3.16279	Carbamidomethylation; Deamidation only N	138110	Multimerin-1 OS=Homo sapiens GN=MMRN1 PE=1 SV=3
P12814	ACTN1_HUMAN	320.58	19	14	4.44186	4.57576	4	4.93023	Carbamidomethylation; Oxidation (M)	103058	Alpha-actinin-1 OS=Homo sapiens GN=ACTN1 PE=1 SV=2
P18206	VINC_HUMAN	319.64	15	15	3.34884	3.57576	2.6	4.5814		123799	Vinculin OS=Homo sapiens GN=VCL PE=1 SV=4
P37802	TAGL2_HUMAN	318.62	13	13	13	13.0606	12.8	3.95349	Carbamidomethylation; Oxidation (M); Deamidation only N	22391	Transgelin-2 OS=Homo sapiens GN=TAGLN2 PE=1 SV=3
P02775	CXCL7_HUMAN	317.78	12	12	33.5349	34.4545	30.5	8.62791	Carbamidomethylation; Deamidation only N	13894	Platelet basic protein OS=Homo sapiens GN=PPBP PE=1 SV=3
P01880	IGHD_HUMAN	316.73	8	8	4.46512	4.54545	4.2	2.04651	Carbamidomethylation	42254	Ig delta chain C region OS=Homo sapiens GN=IGHD PE=1 SV=2
O75636	FCN3_HUMAN	313.21	8	8	7.2093	5.72727	12.1	2.13953	Carbamidomethylation; Oxidation (M)	32903	Ficolin-3 OS=Homo sapiens GN=FCN3 PE=1 SV=2
Q92954	PRG4_HUMAN	310.22	13	13	1.90698	1.60606	2.9	3.04651	Carbamidomethylation; Deamidation only N	151076	Proteoglycan 4 OS=Homo sapiens GN=PRG4 PE=1 SV=2
P35858	ALS_HUMAN	308.55	14	14	7	7.54545	5.2	6.18605	Carbamidomethylation; Deamidation only N	66035	Insulin-like growth factor-binding protein complex acid labile subunit OS=Homo sapiens GN=IGFALS PE=1 SV=1
P01622	KV304_HUMAN	305.92	5	1	41.4884	41.2727	42.2	20	Carbamidomethylation	11788	Ig kappa chain V-III region Ti OS=Homo sapiens PE=1 SV=1
P36980	FHR2_HUMAN	304.79	9	4	21.2326	22.1818	18.1	14.6977	Carbamidomethylation; Oxidation (M); Deamidation only N	30651	Complement factor H-related protein 2 OS=Homo sapiens GN=CFHR2 PE=1 SV=1
Q9UGM5	FETUB_HUMAN	303.38	9	9	5.60465	6.63636	2.2	2.09302	Carbamidomethylation; Deamidation only N	42055	Fetuin-B OS=Homo sapiens GN=FETUB PE=1 SV=2
P07360	CO8G_HUMAN	303.24	6	6	24.3488	23.8182	26.1	6.93023	Carbamidomethylation	22277	Complement component C8 gamma chain OS=Homo sapiens GN=C8G PE=1 SV=3
P50552	VASP_HUMAN	303.12	11	11	6.72093	7.21212	5.1	2.48837	Carbamidomethylation	39830	Vasodilator-stimulated phosphoprotein OS=Homo sapiens GN=VASP PE=1 SV=3
P20851	C4BPB_HUMAN	303.07	9	9	20.9302	21.0909	20.4	7.11628	Carbamidomethylation; Deamidation only N	28357	C4b-binding protein beta chain OS=Homo sapiens GN=C4BPB PE=1 SV=1
P49747	COMP_HUMAN	300.04	9	9	5.44186	5.9697	3.7	3.5814	Carbamidomethylation; Deamidation only N	82861	Cartilage oligomeric matrix protein OS=Homo sapiens GN=COMP PE=1 SV=2
P04264	K2C1_HUMAN	298.3	9	8	4.2093	3.54545	6.4	2.2093	Carbamidomethylation	66039	Keratin type II cytoskeletal 1 OS=Homo sapiens GN=KRT1 PE=1 SV=6
P26927	HGFL_HUMAN	297.02	13	13	5.67442	5.81818	5.2	5.25581	Carbamidomethylation; Deamidation only N	80320	Hepatocyte growth factor-like protein OS=Homo sapiens GN=MST1 PE=1 SV=2
P00740	FA9_HUMAN	297.01	9	9	7.06977	7.06061	7.1	6.09302	Carbamidomethylation; Deamidation only N	51778	Coagulation factor IX OS=Homo sapiens GN=F9 PE=1 SV=2
P07437	TBB5_HUMAN	296.48	12	2	5.7907	5.87879	5.5	2.39535	Carbamidomethylation; Deamidation only N	49671	Tubulin beta chain OS=Homo sapiens GN=TUBB PE=1 SV=2
P01019	ANGT_HUMAN	292.26	11	11	8.51163	8.18182	9.6	8.16279	Deamidation only N	53154	Angiotensinogen OS=Homo sapiens GN=AGT PE=1 SV=1
Q562R1	ACTBL_HUMAN	290.32	8	3	7.86047	7.75758	8.2	13.3023	Carbamidomethylation; Oxidation (M); Deamidation only N	42003	Beta-actin-like protein 2 OS=Homo sapiens GN=ACTBL2 PE=1 SV=2
P22792	CPN2_HUMAN	289.13	8	8	6.34884	5.9697	7.6	5.06977	Carbamidomethylation; Deamidation only N	60557	Carboxypeptidase N subunit 2 OS=Homo sapiens GN=CPN2 PE=1 SV=3
P35542	SAA4_HUMAN	288.19	8	8	25.7209	26.1818	24.2	5.32558	Deamidation only N	14747	Serum amyloid A-4 protein OS=Homo sapiens GN=SAA4 PE=1 SV=2
Q9H4B7	TBB1_HUMAN	287.17	10	10	5.83721	6.0303	5.2	2.44186	Deamidation only N	50327	Tubulin beta-1 chain OS=Homo sapiens GN=TUBB1 PE=1 SV=1
Q05682	CALD1_HUMAN	285.14	9	9	2.72093	2.90909	2.1	1.51163	Oxidation (M)	93231	Caldesmon OS=Homo sapiens GN=CALD1 PE=1 SV=3
P00742	FA10_HUMAN	285.03	10	10	9.5814	9.45455	10	7.11628	Carbamidomethylation; Deamidation only N	54732	Coagulation factor X OS=Homo sapiens GN=F10 PE=1 SV=2
P07737	PROF1_HUMAN	281.7	6	6	24.814	25.4242	22.8	4.93023	Carbamidomethylation; Deamidation only N	15054	Profilin-1 OS=Homo sapiens GN=PFN1 PE=1 SV=2
Q9Y4G6	TLN2_HUMAN	279.59	11	3	1.34884	1.36364	1.3	4.32558	Carbamidomethylation	271611	Talin-2 OS=Homo sapiens GN=TLN2 PE=1 SV=4
P08567	PLEK_HUMAN	277.31	7	7	5.76744	5.51515	6.6	1.67442	Carbamidomethylation; Deamidation only N	40125	Pleckstrin OS=Homo sapiens GN=PLEK PE=1 SV=3
P60660	MYL6_HUMAN	276.75	9	9	14.5814	15.7576	10.7	3.32558	Carbamidomethylation	16930	Myosin light polypeptide 6 OS=Homo sapiens GN=MYL6 PE=1 SV=2
P11021	GRP78_HUMAN	273.81	12	11	3.44186	3.21212	4.2	2.88372		72333	78 kDa glucose-regulated protein OS=Homo sapiens GN=HSPA5 PE=1 SV=2
P68371	TBB2C_HUMAN	273.8	12	2	4.53488	4.48485	4.7	1.7907	Carbamidomethylation; Deamidation only N	49831	Tubulin beta-2C chain OS=Homo sapiens GN=TUBB2C PE=1 SV=1
P04406	G3P_HUMAN	273.37	12	12	8.25581	8.27273	8.2	3.27907	Carbamidomethylation	36053	Glyceraldehyde-3-phosphate dehydrogenase OS=Homo sapiens GN=GAPDH PE=1 SV=3
Q96IY4	CBPB2_HUMAN	271.25	5	5	9.48837	9.45455	9.6	3.53488	Carbamidomethylation; Deamidation only N	48424	Carboxypeptidase B2 OS=Homo sapiens GN=CPB2 PE=1 SV=2
P06753	TPM3_HUMAN	269.05	10	3	9.23256	9.36364	8.8	3.7907		32819	Tropomyosin alpha-3 chain OS=Homo sapiens GN=TPM3 PE=1 SV=1
Q9BXR6	FHR5_HUMAN	267.87	9	8	7.44186	7.54545	7.1	4.72093	Carbamidomethylation	64420	Complement factor H-related protein 5 OS=Homo sapiens GN=CFHR5 PE=1 SV=1
P01617	KV204_HUMAN	267.68	3	1	30.2093	30.2727	30	9.4186	Carbamidomethylation; Oxidation (M)	12316	Ig kappa chain V-II region TEW OS=Homo sapiens PE=1 SV=1
P01625	KV402_HUMAN	265.22	4	3	17.9767	17.9697	18	6.81395	Carbamidomethylation; Oxidation (M)	12640	Ig kappa chain V-IV region Len OS=Homo sapiens PE=1 SV=2
P80748	LV302_HUMAN	264.82	4	4	37.814	37.5152	38.8	13.4419	Deamidation only N	11935	Ig lambda chain V-III region LOI OS=Homo sapiens PE=1 SV=1
P17936	IBP3_HUMAN	261.83	12	12	9.46512	11	4.4	2.95349	Carbamidomethylation; Deamidation only N	31674	Insulin-like growth factor-binding protein 3 OS=Homo sapiens GN=IGFBP3 PE=1 SV=2
P63104	1433Z_HUMAN	259.38	7	6	10.1163	10.2121	9.8	3.25581	Carbamidomethylation	27745	14-3-3 protein zeta/delta OS=Homo sapiens GN=YWHAZ PE=1 SV=1
P16109	LYAM3_HUMAN	258.68	6	6	2.25581	2.39394	1.8	1.88372	Carbamidomethylation; Deamidation only N	90834	P-selectin OS=Homo sapiens GN=SELP PE=1 SV=3
P18065	IBP2_HUMAN	258.27	6	6	6.53488	5.72727	9.2	2.62791	Carbamidomethylation	34814	Insulin-like growth factor-binding protein 2 OS=Homo sapiens GN=IGFBP2 PE=1 SV=2
Q04756	HGFA_HUMAN	255.27	10	10	1.7907	1.60606	2.4	0.906977	Carbamidomethylation; Oxidation (M)	70682	Hepatocyte growth factor activator OS=Homo sapiens GN=HGFAC PE=1 SV=1
P07951	TPM2_HUMAN	254.44	10	2	8.65116	8.90909	7.8	3.46512		32851	Tropomyosin beta chain OS=Homo sapiens GN=TPM2 PE=1 SV=1
Q71U36	TBA1A_HUMAN	253.93	8	4	3.88372	3.81818	4.1	1.55814	Carbamidomethylation	50136	Tubulin alpha-1A chain OS=Homo sapiens GN=TUBA1A PE=1 SV=1
P68363	TBA1B_HUMAN	253.93	8	4	3.88372	3.81818	4.1	1.55814	Carbamidomethylation	50152	Tubulin alpha-1B chain OS=Homo sapiens GN=TUBA1B PE=1 SV=1
P80108	PHLD_HUMAN	252.23	10	10	2.81395	3.0303	2.1	3.55814	Carbamidomethylation	92336	Phosphatidylinositol-glycan-specific phospholipase D OS=Homo sapiens GN=GPLD1 PE=1 SV=3
O95810	SDPR_HUMAN	250.66	9	9	6.55814	7.15152	4.6	3.37209		47173	Serum deprivation-response protein OS=Homo sapiens GN=SDPR PE=1 SV=3
P04350	TBB4_HUMAN	250.39	9	1	3.76744	3.69697	4	1.48837	Carbamidomethylation; Oxidation (M); Deamidation only N	49586	Tubulin beta-4 chain OS=Homo sapiens GN=TUBB4 PE=1 SV=2
P68366	TBA4A_HUMAN	250.36	8	4	3.74419	3.57576	4.3	1.48837	Carbamidomethylation	49924	Tubulin alpha-4A chain OS=Homo sapiens GN=TUBA4A PE=1 SV=1
P62937	PPIA_HUMAN	248.66	6	6	16.6047	16.3636	17.4	3.53488	Carbamidomethylation; Deamidation only N	18012	Peptidyl-prolyl cis-trans isomerase A OS=Homo sapiens GN=PPIA PE=1 SV=2
P01610	KV118_HUMAN	247.66	4	3	25.2791	24.4848	27.9	13.6977	Carbamidomethylation; Oxidation (M)	11840	Ig kappa chain V-I region WEA OS=Homo sapiens PE=1 SV=1
P01781	HV320_HUMAN	243.54	7	7	14.3488	12.8182	19.4	2.74419	Carbamidomethylation; Deamidation only N	12730	Ig heavy chain V-III region GAL OS=Homo sapiens PE=1 SV=1
P14618	KPYM_HUMAN	243.1	11	11	3.88372	3.60606	4.8	1.93023	Carbamidomethylation	57937	Pyruvate kinase isozymes M1/M2 OS=Homo sapiens GN=PKM2 PE=1 SV=4
P02776	PLF4_HUMAN	242.91	6	3	16.2558	17.3333	12.7	2.25581	Carbamidomethylation	10845	Platelet factor 4 OS=Homo sapiens GN=PF4 PE=1 SV=2
P01614	KV201_HUMAN	242.47	3	1	29	29.4848	27.4	4.23256	Carbamidomethylation	12676	Ig kappa chain V-II region Cum OS=Homo sapiens PE=1 SV=1
P06310	KV206_HUMAN	242.18	4	3	20.2558	20.2121	20.4	3.62791	Deamidation only N	14707	Ig kappa chain V-II region RPMI 6410 OS=Homo sapiens PE=4 SV=1
P05062	ALDOB_HUMAN	241.28	9	8	1.46512	1.30303	2	0.627907	Carbamidomethylation; Oxidation (M)	39473	Fructose-bisphosphate aldolase B OS=Homo sapiens GN=ALDOB PE=1 SV=2
P11142	HSP7C_HUMAN	240.17	8	7	2.34884	2.36364	2.3	2	Deamidation only N	70898	Heat shock cognate 71 kDa protein OS=Homo sapiens GN=HSPA8 PE=1 SV=1
Q86UX7	URP2_HUMAN	239.39	7	7	2.93023	2.84848	3.2	1.65116	Carbamidomethylation	75953	Fermitin family homolog 3 OS=Homo sapiens GN=FERMT3 PE=1 SV=1
P49908	SEPP1_HUMAN	238.23	8	8	5.55814	5.39394	6.1	3.30233	Carbamidomethylation; Deamidation only N	43174	Selenoprotein P OS=Homo sapiens GN=SEPP1 PE=1 SV=3
P04792	HSPB1_HUMAN	236.06	5	5	7.13953	7.42424	6.2	1.37209		22783	Heat shock protein beta-1 OS=Homo sapiens GN=HSPB1 PE=1 SV=2
P02747	C1QC_HUMAN	235.57	6	6	12.5814	12.0303	14.4	4.86047	Carbamidomethylation	25774	Complement C1q subcomponent subunit C OS=Homo sapiens GN=C1QC PE=1 SV=3
P01765	HV304_HUMAN	234.88	5	3	26.3256	25.1818	30.1	11.0698	Carbamidomethylation; Oxidation (M)	12356	Ig heavy chain V-III region TIL OS=Homo sapiens PE=1 SV=1
Q9BVA1	TBB2B_HUMAN	232.8	6	1	3.81395	3.84848	3.7	1.72093	Carbamidomethylation; Deamidation only N	49953	Tubulin beta-2B chain OS=Homo sapiens GN=TUBB2B PE=1 SV=1
Q13885	TBB2A_HUMAN	232.8	6	1	3.81395	3.84848	3.7	1.72093	Carbamidomethylation; Deamidation only N	49907	Tubulin beta-2A chain OS=Homo sapiens GN=TUBB2A PE=1 SV=1
P01714	LV301_HUMAN	231.89	5	5	18.4186	18.1212	19.4	4.11628	Carbamidomethylation; Deamidation only N	11393	Ig lambda chain V-III region SH OS=Homo sapiens PE=1 SV=1
P10720	PF4V_HUMAN	227.53	4	1	22.2791	23.7879	17.3	3.32558	Carbamidomethylation	11553	Platelet factor 4 variant OS=Homo sapiens GN=PF4V1 PE=1 SV=1
Q9NZP8	C1RL_HUMAN	226.95	7	6	5.81395	5.78788	5.9	2.97674	Carbamidomethylation; Oxidation (M); Deamidation only N	53498	Complement C1r subcomponent-like protein OS=Homo sapiens GN=C1RL PE=1 SV=2
P05543	THBG_HUMAN	226.81	5	5	6.7907	6.72727	7	3.4186	Carbamidomethylation; Oxidation (M); Deamidation only N	46325	Thyroxine-binding globulin OS=Homo sapiens GN=SERPINA7 PE=1 SV=2
P23083	HV103_HUMAN	222.96	4	4	12.5814	11.8788	14.9	2.51163	Oxidation (M); Deamidation only N	13009	Ig heavy chain V-I region V35 OS=Homo sapiens PE=1 SV=1
O00299	CLIC1_HUMAN	222.07	7	7	3.46512	2.78788	5.7	0.744186	Carbamidomethylation	26923	Chloride intracellular channel protein 1 OS=Homo sapiens GN=CLIC1 PE=1 SV=4
P08571	CD14_HUMAN	221.82	6	6	6.51163	6.45455	6.7	1.81395	Carbamidomethylation; Deamidation only N	40076	Monocyte differentiation antigen CD14 OS=Homo sapiens GN=CD14 PE=1 SV=2
P05452	TETN_HUMAN	221.59	5	5	15.5581	15.1515	16.9	3.65116	Carbamidomethylation	22537	Tetranectin OS=Homo sapiens GN=CLEC3B PE=1 SV=3
A8MW06	TMSL3_HUMAN	219.77	4	4	31.2558	29.2727	37.8	1.69767		5063	Thymosin beta-4-like protein 3 OS=Homo sapiens GN=TMSL3 PE=2 SV=1
P62328	TYB4_HUMAN	219.77	4	4	31.2558	29.2727	37.8	1.69767		5053	Thymosin beta-4 OS=Homo sapiens GN=TMSB4X PE=1 SV=2
P13224	GP1BB_HUMAN	218.9	6	6	7.32558	8.21212	4.4	2.51163	Carbamidomethylation	21718	Platelet glycoprotein Ib beta chain OS=Homo sapiens GN=GP1BB PE=1 SV=1
Q9UBW5	BIN2_HUMAN	218.13	4	4	1.27907	1.33333	1.1	0.511628		61875	Bridging integrator 2 OS=Homo sapiens GN=BIN2 PE=1 SV=3
P01719	LV501_HUMAN	217.86	3	3	38.8372	38.5152	39.9	7.48837	Deamidation only N	11343	Ig lambda chain V-V region DEL OS=Homo sapiens PE=1 SV=1
P01593	KV101_HUMAN	217.49	3	1	34.2558	34.5152	33.4	10.9767	Oxidation (M); Deamidation only N	11992	Ig kappa chain V-I region AG OS=Homo sapiens PE=1 SV=1
P35908	K22E_HUMAN	217.43	7	6	0.395349	0	1.7	0.255814	Carbamidomethylation	65433	Keratin type II cytoskeletal 2 epidermal OS=Homo sapiens GN=KRT2 PE=1 SV=2
P43251	BTD_HUMAN	216.7	6	6	3.48837	3.54545	3.3	1.90698	Carbamidomethylation; Deamidation only N	61133	Biotinidase OS=Homo sapiens GN=BTD PE=1 SV=2
P01776	HV315_HUMAN	213.71	4	3	16.8837	16.4848	18.2	8.69767	Carbamidomethylation; Oxidation (M)	13091	Ig heavy chain V-III region WAS OS=Homo sapiens PE=1 SV=1
P27105	STOM_HUMAN	209.63	5	5	3	3.30303	2	1.25581		31731	Erythrocyte band 7 integral membrane protein OS=Homo sapiens GN=STOM PE=1 SV=3
P01764	HV303_HUMAN	206.06	6	4	16.0233	14.8485	19.9	3.74419	Carbamidomethylation; Oxidation (M); Deamidation only N	12582	Ig heavy chain V-III region VH26 OS=Homo sapiens PE=1 SV=1
Q99439	CNN2_HUMAN	204.29	4	4	2.65116	2.27273	3.9	0.395349	Carbamidomethylation	33697	Calponin-2 OS=Homo sapiens GN=CNN2 PE=1 SV=4
P22891	PROZ_HUMAN	204	4	4	1.53488	1.30303	2.3	0.44186	Carbamidomethylation	44744	Vitamin K-dependent protein Z OS=Homo sapiens GN=PROZ PE=1 SV=2
P35749	MYH11_HUMAN	203.54	7	1	0.465116	0.424242	0.6	1.30233	Carbamidomethylation; Oxidation (M)	227337	Myosin-11 OS=Homo sapiens GN=MYH11 PE=1 SV=3
P61224	RAP1B_HUMAN	202.89	4	4	11.6279	12.2424	9.6	3.2093	Carbamidomethylation; Deamidation only N	20825	Ras-related protein Rap-1b OS=Homo sapiens GN=RAP1B PE=1 SV=1
A6NIZ1	RP1BL_HUMAN	202.89	4	4	11.6279	12.2424	9.6	3.2093	Carbamidomethylation; Deamidation only N	20925	Ras-related protein Rap-1b-like protein OS=Homo sapiens PE=2 SV=1
O75083	WDR1_HUMAN	202.23	4	4	1.4186	1.33333	1.7	1.06977	Carbamidomethylation	66194	WD repeat-containing protein 1 OS=Homo sapiens GN=WDR1 PE=1 SV=4
P01766	HV305_HUMAN	201.97	3	2	21.2326	20.0909	25	15.2326	Carbamidomethylation	13227	Ig heavy chain V-III region BRO OS=Homo sapiens PE=1 SV=1
O43707	ACTN4_HUMAN	201.56	6	1	1.53488	1.57576	1.4	2.04651	Carbamidomethylation	104854	Alpha-actinin-4 OS=Homo sapiens GN=ACTN4 PE=1 SV=2
P19320	VCAM1_HUMAN	201.5	9	9	0.697674	0.272727	2.1	0.325581	Carbamidomethylation; Deamidation only N	81276	Vascular cell adhesion protein 1 OS=Homo sapiens GN=VCAM1 PE=1 SV=1
Q04826	1B40_HUMAN	201.25	5	2	1.16279	0.969697	1.8	0.27907	Carbamidomethylation; Deamidation only N	40505	HLA class I histocompatibility antigen B-40 alpha chain OS=Homo sapiens GN=HLA-B PE=1 SV=1
P30480	1B42_HUMAN	201.25	5	2	1.16279	0.969697	1.8	0.27907	Carbamidomethylation; Deamidation only N	40333	HLA class I histocompatibility antigen B-42 alpha chain OS=Homo sapiens GN=HLA-B PE=1 SV=1
P30460	1B08_HUMAN	201.25	5	2	1.16279	0.969697	1.8	0.27907	Carbamidomethylation; Deamidation only N	40331	HLA class I histocompatibility antigen B-8 alpha chain OS=Homo sapiens GN=HLA-B PE=1 SV=1
P01889	1B07_HUMAN	201.25	5	2	1.16279	0.969697	1.8	0.27907	Carbamidomethylation; Deamidation only N	40460	HLA class I histocompatibility antigen B-7 alpha chain OS=Homo sapiens GN=HLA-B PE=1 SV=3
Q01518	CAP1_HUMAN	199.88	5	5	2.44186	2.30303	2.9	1.13953	Carbamidomethylation	51902	Adenylyl cyclase-associated protein 1 OS=Homo sapiens GN=CAP1 PE=1 SV=5
P01034	CYTC_HUMAN	198.84	4	4	9.86047	8.27273	15.1	1.7907	Carbamidomethylation	15799	Cystatin-C OS=Homo sapiens GN=CST3 PE=1 SV=1
P01609	KV117_HUMAN	198.58	3	2	20.0698	20	20.3	7.16279	Carbamidomethylation; Oxidation (M)	11764	Ig kappa chain V-I region Scw OS=Homo sapiens PE=1 SV=1
P04433	KV309_HUMAN	198.07	4	4	15.8837	14.4848	20.5	3.81395	Carbamidomethylation; Deamidation only N	12575	Ig kappa chain V-III region VG (Fragment) OS=Homo sapiens PE=1 SV=1
P01598	KV106_HUMAN	196.17	3	2	27.814	28.0606	27	10.4419	Carbamidomethylation; Oxidation (M)	11788	Ig kappa chain V-I region EU OS=Homo sapiens PE=1 SV=1
P01599	KV107_HUMAN	195.89	3	1	18.093	18.2727	17.5	7.02326	Carbamidomethylation; Oxidation (M)	11814	Ig kappa chain V-I region Gal OS=Homo sapiens PE=1 SV=1
Q6UXB8	PI16_HUMAN	195.69	4	4	1.4186	1.72727	0.4	0.534884	Carbamidomethylation; Deamidation only N	49471	Peptidase inhibitor 16 OS=Homo sapiens GN=PI16 PE=1 SV=1
P04278	SHBG_HUMAN	193.69	6	6	2.11628	2.45455	1	0.651163	Carbamidomethylation; Deamidation only N	43779	Sex hormone-binding globulin OS=Homo sapiens GN=SHBG PE=1 SV=2
Q13790	APOF_HUMAN	191.25	4	4	7.62791	8.30303	5.4	2.44186	Carbamidomethylation; Deamidation only N	35400	Apolipoprotein F OS=Homo sapiens GN=APOF PE=1 SV=2
P06702	S10A9_HUMAN	188.71	5	5	3.37209	4	1.3	0.44186		13242	Protein S100-A9 OS=Homo sapiens GN=S100A9 PE=1 SV=1
P10809	CH60_HUMAN	187.83	3	3	0.186047	0.121212	0.4	0.0697674		61055	60 kDa heat shock protein mitochondrial OS=Homo sapiens GN=HSPD1 PE=1 SV=2
P01767	HV306_HUMAN	186.28	3	2	20.4419	19.0606	25	4.72093	Carbamidomethylation	12379	Ig heavy chain V-III region BUT OS=Homo sapiens PE=1 SV=1
P60174	TPIS_HUMAN	185.21	5	5	4.60465	4.75758	4.1	1.4186	Carbamidomethylation	26669	Triosephosphate isomerase OS=Homo sapiens GN=TPI1 PE=1 SV=2
P13645	K1C10_HUMAN	184.99	4	3	0.395349	0.272727	0.8	0.302326		58827	Keratin type I cytoskeletal 10 OS=Homo sapiens GN=KRT10 PE=1 SV=6
P06276	CHLE_HUMAN	184.65	5	5	1.81395	1.75758	2	0.976744	Carbamidomethylation; Deamidation only N	68418	Cholinesterase OS=Homo sapiens GN=BCHE PE=1 SV=1
P01854	IGHE_HUMAN	183.25	7	7	0.209302	0.272727	0	0.162791	Carbamidomethylation; Deamidation only N	47019	Ig epsilon chain C region OS=Homo sapiens GN=IGHE PE=1 SV=1
P04180	LCAT_HUMAN	180.8	4	4	2.93023	2.93939	2.9	1.18605	Carbamidomethylation; Deamidation only N	49578	Phosphatidylcholine-sterol acyltransferase OS=Homo sapiens GN=LCAT PE=1 SV=1
P09172	DOPO_HUMAN	180.53	4	4	1.60465	1.60606	1.6	1.32558	Carbamidomethylation	69065	Dopamine beta-hydroxylase OS=Homo sapiens GN=DBH PE=1 SV=3
P01594	KV102_HUMAN	179.31	2	1	20.5814	19.9697	22.6	7.2093	Oxidation (M)	11939	Ig kappa chain V-I region AU OS=Homo sapiens PE=1 SV=1
P04208	LV106_HUMAN	178.61	3	2	15.4651	15.6061	15	2.53488		11725	Ig lambda chain V-I region WAH OS=Homo sapiens PE=1 SV=1
P54108	CRIS3_HUMAN	177.56	4	4	3.7907	3.66667	4.2	1.37209	Carbamidomethylation	27630	Cysteine-rich secretory protein 3 OS=Homo sapiens GN=CRISP3 PE=1 SV=1
P01621	KV303_HUMAN	177.37	4	3	5.53488	4.87879	7.7	0.744186		10729	Ig kappa chain V-III region NG9 (Fragment) OS=Homo sapiens PE=1 SV=1
P01611	KV119_HUMAN	175.83	2	2	20.2326	19.697	22	6.48837	Carbamidomethylation; Oxidation (M)	11608	Ig kappa chain V-I region Wes OS=Homo sapiens PE=1 SV=1
P61981	1433G_HUMAN	173.42	4	2	2.67442	2.57576	3	0.744186		28303	14-3-3 protein gamma OS=Homo sapiens GN=YWHAG PE=1 SV=2
P02786	TFR1_HUMAN	173.38	4	4	0.488372	0.454545	0.6	0.488372	Carbamidomethylation	84871	Transferrin receptor protein 1 OS=Homo sapiens GN=TFRC PE=1 SV=2
Q7Z406	MYH14_HUMAN	172.72	6	2	0.209302	0.151515	0.4	0.534884	Carbamidomethylation	227868	Myosin-14 OS=Homo sapiens GN=MYH14 PE=1 SV=2
P02746	C1QB_HUMAN	172.68	3	3	7.72093	7.54545	8.3	2.60465	Deamidation only N	26722	Complement C1q subcomponent subunit B OS=Homo sapiens GN=C1QB PE=1 SV=3
P06316	LV107_HUMAN	172.64	3	3	12.8837	12.2424	15	2.90698	Deamidation only N	13564	Ig lambda chain V-I region BL2 OS=Homo sapiens PE=2 SV=1
P01702	LV104_HUMAN	172.64	3	3	15.2791	14.5152	17.8	2.90698	Deamidation only N	11454	Ig lambda chain V-I region NIG-64 OS=Homo sapiens PE=1 SV=1
P23528	COF1_HUMAN	172.51	3	3	5.39535	4.63636	7.9	1.04651		18502	Cofilin-1 OS=Homo sapiens GN=CFL1 PE=1 SV=3
P08185	CBG_HUMAN	171.28	5	5	1.32558	1.54545	0.6	0.604651	Deamidation only N	45141	Corticosteroid-binding globulin OS=Homo sapiens GN=SERPINA6 PE=1 SV=1
Q9NY65	TBA8_HUMAN	170.69	3	1	2.44186	2.48485	2.3	0.837209	Oxidation (M)	50094	Tubulin alpha-8 chain OS=Homo sapiens GN=TUBA8 PE=1 SV=1
P69891	HBG1_HUMAN	170.51	3	2	7.7907	7.84848	7.6	7.65116		16140	Hemoglobin subunit gamma-1 OS=Homo sapiens GN=HBG1 PE=1 SV=2
P69892	HBG2_HUMAN	170.51	3	2	7.7907	7.84848	7.6	7.65116		16126	Hemoglobin subunit gamma-2 OS=Homo sapiens GN=HBG2 PE=1 SV=2
P01613	KV121_HUMAN	169.35	2	1	27.4884	27.697	26.8	7.51163	Deamidation only N	12246	Ig kappa chain V-I region Ni OS=Homo sapiens PE=1 SV=1
P07998	RNAS1_HUMAN	167.53	2	2	9.37209	9.84848	7.8	1.23256	Carbamidomethylation	17644	Ribonuclease pancreatic OS=Homo sapiens GN=RNASE1 PE=1 SV=4
Q92496	FHR4_HUMAN	167.19	5	3	2.44186	2.36364	2.7	1.48837	Carbamidomethylation; Deamidation only N	37299	Complement factor H-related protein 4 OS=Homo sapiens GN=CFHR4 PE=1 SV=2
P15814	IGLL1_HUMAN	166.47	3	3	7.04651	6.90909	7.5	2.32558	Carbamidomethylation; Deamidation only N	22963	Immunoglobulin lambda-like polypeptide 1 OS=Homo sapiens GN=IGLL1 PE=1 SV=1
P01624	KV306_HUMAN	166.21	3	2	21.093	20.1515	24.2	3.90698	Carbamidomethylation; Oxidation (M)	11922	Ig kappa chain V-III region POM OS=Homo sapiens PE=1 SV=1
P04430	KV122_HUMAN	165.79	2	2	14.4186	15.1818	11.9	2.4186	Carbamidomethylation	11840	Ig kappa chain V-I region BAN OS=Homo sapiens PE=1 SV=1
P02745	C1QA_HUMAN	165.28	5	5	3.37209	3.75758	2.1	0.465116	Carbamidomethylation; Deamidation only N	26017	Complement C1q subcomponent subunit A OS=Homo sapiens GN=C1QA PE=1 SV=2
P01608	KV116_HUMAN	164.63	2	1	22.6977	22.7273	22.6	8.25581	Oxidation (M)	11782	Ig kappa chain V-I region Roy OS=Homo sapiens PE=1 SV=1
P28799	GRN_HUMAN	164.55	2	2	3.4186	3.30303	3.8	2.23256	Carbamidomethylation; Oxidation (M)	63545	Granulins OS=Homo sapiens GN=GRN PE=1 SV=2
P00558	PGK1_HUMAN	163.93	3	3	0.581395	0.363636	1.3	0.255814	Carbamidomethylation	44615	Phosphoglycerate kinase 1 OS=Homo sapiens GN=PGK1 PE=1 SV=3
P05534	1A24_HUMAN	163.4	4	1	1.95349	2.12121	1.4	0.465116	Carbamidomethylation	40689	HLA class I histocompatibility antigen A-24 alpha chain OS=Homo sapiens GN=HLA-A PE=1 SV=2
P30447	1A23_HUMAN	163.4	4	1	1.95349	2.12121	1.4	0.465116	Carbamidomethylation	40733	HLA class I histocompatibility antigen A-23 alpha chain OS=Homo sapiens GN=HLA-A PE=1 SV=1
P01700	LV102_HUMAN	162.3	3	1	11.6977	11.2727	13.1	2.2093	Carbamidomethylation; Deamidation only N	11896	Ig lambda chain V-I region HA OS=Homo sapiens PE=1 SV=1
Q14247	SRC8_HUMAN	161.99	4	4	0.581395	0.757576	0	0.162791		61586	Src substrate cortactin OS=Homo sapiens GN=CTTN PE=1 SV=2
P07195	LDHB_HUMAN	161.84	3	2	4.37209	4.30303	4.6	1.83721	Carbamidomethylation	36639	L-lactate dehydrogenase B chain OS=Homo sapiens GN=LDHB PE=1 SV=2
P01833	PIGR_HUMAN	161.3	3	3	0.837209	0.545455	1.8	0.55814	Carbamidomethylation	83284	Polymeric immunoglobulin receptor OS=Homo sapiens GN=PIGR PE=1 SV=4
P01892	1A02_HUMAN	159.88	4	1	1.74419	1.84848	1.4	0.348837	Carbamidomethylation; Deamidation only N	40922	HLA class I histocompatibility antigen A-2 alpha chain OS=Homo sapiens GN=HLA-A PE=1 SV=1
P31946	1433B_HUMAN	159.65	3	1	2.55814	2.51515	2.7	0.651163		28082	14-3-3 protein beta/alpha OS=Homo sapiens GN=YWHAB PE=1 SV=3
P00915	CAH1_HUMAN	158.71	3	3	3.39535	2.84848	5.2	0.883721	Deamidation only N	28870	Carbonic anhydrase 1 OS=Homo sapiens GN=CA1 PE=1 SV=2
P01717	LV403_HUMAN	157.77	1	1	18	18	18	13.8837		11517	Ig lambda chain V-IV region Hil OS=Homo sapiens PE=1 SV=1
P01607	KV115_HUMAN	157.59	2	1	17.3023	17.3939	17	6.81395	Oxidation (M)	11902	Ig kappa chain V-I region Rei OS=Homo sapiens PE=1 SV=1
P51884	LUM_HUMAN	156.7	6	6	4.76744	5.06061	3.8	2.25581	Carbamidomethylation	38429	Lumican OS=Homo sapiens GN=LUM PE=1 SV=2
P48740	MASP1_HUMAN	155.48	6	6	0.348837	0.181818	0.9	0.27907	Carbamidomethylation	79247	Mannan-binding lectin serine protease 1 OS=Homo sapiens GN=MASP1 PE=1 SV=3
P04040	CATA_HUMAN	155.37	4	4	0.930233	0.818182	1.3	0.395349	Carbamidomethylation	59756	Catalase OS=Homo sapiens GN=CAT PE=1 SV=3
P61626	LYSC_HUMAN	155.03	2	2	4.46512	4.72727	3.6	0.534884	Deamidation only N	16537	Lysozyme C OS=Homo sapiens GN=LYZ PE=1 SV=1
Q04917	1433F_HUMAN	152.39	3	2	1.46512	1.51515	1.3	0.372093	Oxidation (M)	28219	14-3-3 protein eta OS=Homo sapiens GN=YWHAH PE=1 SV=4
P00338	LDHA_HUMAN	152.08	3	2	3.44186	3.39394	3.6	1.39535	Carbamidomethylation	36689	L-lactate dehydrogenase A chain OS=Homo sapiens GN=LDHA PE=1 SV=2
P00488	F13A_HUMAN	151.89	4	4	2.04651	2.09091	1.9	1.16279	Carbamidomethylation	83267	Coagulation factor XIII A chain OS=Homo sapiens GN=F13A1 PE=1 SV=4
P27348	1433T_HUMAN	151.5	3	2	1.30233	1.51515	0.6	0.395349	Carbamidomethylation	27764	14-3-3 protein theta OS=Homo sapiens GN=YWHAQ PE=1 SV=1
P31146	COR1A_HUMAN	151.49	4	4	0.232558	0.0909091	0.7	0.0697674	Carbamidomethylation	51026	Coronin-1A OS=Homo sapiens GN=CORO1A PE=1 SV=4
P01596	KV104_HUMAN	149.38	2	1	17	17	17	4.60465	Oxidation (M)	11704	Ig kappa chain V-I region CAR OS=Homo sapiens PE=1 SV=1
Q86VB7	C163A_HUMAN	146.4	4	4	0.116279	0	0.5	0.0930233	Carbamidomethylation; Deamidation only N	125451	Scavenger receptor cysteine-rich type 1 protein M130 OS=Homo sapiens GN=CD163 PE=1 SV=2
P01770	HV309_HUMAN	146.12	3	2	11.6279	11.1212	13.3	1.83721	Carbamidomethylation; Oxidation (M); Deamidation only N	13242	Ig heavy chain V-III region NIE OS=Homo sapiens PE=1 SV=1
P61158	ARP3_HUMAN	145.92	4	4	0.674419	0.636364	0.8	0.27907	Carbamidomethylation	47371	Actin-related protein 3 OS=Homo sapiens GN=ACTR3 PE=1 SV=3
P14770	GPIX_HUMAN	143.82	3	3	2.72093	2.84848	2.3	0.44186	Carbamidomethylation	19046	Platelet glycoprotein IX OS=Homo sapiens GN=GP9 PE=1 SV=3
P06888	LV109_HUMAN	142.11	3	3	0.883721	1.15152	0	0.139535	Carbamidomethylation; Deamidation only N	11414	Ig lambda chain V-I region EPS OS=Homo sapiens PE=1 SV=1
P14625	ENPL_HUMAN	141.12	4	4	0.348837	0.212121	0.8	0.232558	Carbamidomethylation	92469	Endoplasmin OS=Homo sapiens GN=HSP90B1 PE=1 SV=1
Q13418	ILK_HUMAN	140.8	3	3	0.883721	0.848485	1	0.581395	Carbamidomethylation	51419	Integrin-linked protein kinase OS=Homo sapiens GN=ILK PE=1 SV=2
P29622	KAIN_HUMAN	139.87	4	4	1.25581	1.24242	1.3	0.627907	Carbamidomethylation	48542	Kallistatin OS=Homo sapiens GN=SERPINA4 PE=1 SV=3
P02741	CRP_HUMAN	139.16	2	2	1.95349	1.33333	4	0.604651		25039	C-reactive protein OS=Homo sapiens GN=CRP PE=1 SV=1
P00746	CFAD_HUMAN	139.16	3	3	1.48837	1.39394	1.8	0.372093	Carbamidomethylation	27033	Complement factor D OS=Homo sapiens GN=CFD PE=1 SV=5
P01612	KV120_HUMAN	138.71	2	2	8.62791	7.21212	13.3	1.09302	Oxidation (M)	11870	Ig kappa chain V-I region Mev OS=Homo sapiens PE=1 SV=1
P01616	KV203_HUMAN	138.23	1	1	10.7442	10.8182	10.5	1.72093	Carbamidomethylation	12056	Ig kappa chain V-II region MIL OS=Homo sapiens PE=1 SV=1
Q9Y624	JAM1_HUMAN	136.89	2	2	2.51163	2.27273	3.3	0.348837	Carbamidomethylation; Deamidation only N	32583	Junctional adhesion molecule A OS=Homo sapiens GN=F11R PE=1 SV=1
P00441	SODC_HUMAN	135.65	2	2	3.11628	3.0303	3.4	0.372093	Carbamidomethylation	15936	Superoxide dismutase [Cu-Zn] OS=Homo sapiens GN=SOD1 PE=1 SV=2
P04209	LV211_HUMAN	135.35	3	3	0.651163	0.848485	0	0.0465116	Carbamidomethylation	11581	Ig lambda chain V-II region NIG-84 OS=Homo sapiens PE=1 SV=1
Q9ULV4	COR1C_HUMAN	135.29	4	4	0.604651	0.545455	0.8	0.186047		53249	Coronin-1C OS=Homo sapiens GN=CORO1C PE=1 SV=1
P05154	IPSP_HUMAN	134.98	4	4	1.13953	1.18182	1	0.697674	Deamidation only N	45675	Plasma serine protease inhibitor OS=Homo sapiens GN=SERPINA5 PE=1 SV=3
Q15848	ADIPO_HUMAN	134.41	2	2	1.81395	1.45455	3	0.418605		26414	Adiponectin OS=Homo sapiens GN=ADIPOQ PE=1 SV=1
P30041	PRDX6_HUMAN	134.33	2	2	2.62791	2.84848	1.9	0.55814	Carbamidomethylation	25035	Peroxiredoxin-6 OS=Homo sapiens GN=PRDX6 PE=1 SV=3
P01743	HV102_HUMAN	134.29	2	2	7.2093	6.27273	10.3	1.76744	Carbamidomethylation	12946	Ig heavy chain V-I region HG3 OS=Homo sapiens PE=4 SV=1
P06331	HV209_HUMAN	132.65	2	2	6.53488	6	8.3	1.32558	Carbamidomethylation	16228	Ig heavy chain V-II region ARH-77 OS=Homo sapiens PE=4 SV=1
P02788	TRFL_HUMAN	131.2	4	4	0.302326	0.363636	0.1	0.209302	Carbamidomethylation; Deamidation only N	78182	Lactotransferrin OS=Homo sapiens GN=LTF PE=1 SV=6
P59666	DEF3_HUMAN	130.78	3	3	1.86047	2.42424	0	0.302326	Carbamidomethylation	10245	Neutrophil defensin 3 OS=Homo sapiens GN=DEFA3 PE=1 SV=1
P59665	DEF1_HUMAN	130.78	3	3	1.86047	2.42424	0	0.302326	Carbamidomethylation	10201	Neutrophil defensin 1 OS=Homo sapiens GN=DEFA1 PE=1 SV=1
P04070	PROC_HUMAN	130.73	1	1	2.04651	2.06061	2	0.860465		52071	Vitamin K-dependent protein C OS=Homo sapiens GN=PROC PE=1 SV=1
P22352	GPX3_HUMAN	130.01	4	4	1.90698	1.09091	4.6	0.511628	Carbamidomethylation	25552	Glutathione peroxidase 3 OS=Homo sapiens GN=GPX3 PE=1 SV=2
P01763	HV302_HUMAN	129.85	3	2	6.55814	6.12121	8	1.06977	Carbamidomethylation	12256	Ig heavy chain V-III region WEA OS=Homo sapiens PE=1 SV=1
P01703	LV105_HUMAN	129.03	2	2	9.34884	8.60606	11.8	0.930233	Carbamidomethylation	10904	Ig lambda chain V-I region NEWM OS=Homo sapiens PE=1 SV=1
P27797	CALR_HUMAN	128.95	1	1	1.13953	1.06061	1.4	0.186047		48142	Calreticulin OS=Homo sapiens GN=CALR PE=1 SV=1
P61769	B2MG_HUMAN	127.63	3	3	3.65116	3	5.8	0.325581	Carbamidomethylation; Deamidation only N	13715	Beta-2-microglobulin OS=Homo sapiens GN=B2M PE=1 SV=1
P01775	HV314_HUMAN	127.13	2	2	1.86047	2.42424	0	0.186047	Carbamidomethylation	12858	Ig heavy chain V-III region LAY OS=Homo sapiens PE=1 SV=1
P04434	KV310_HUMAN	126.93	2	1	17.5814	17.5455	17.7	4.13953	Oxidation (M)	12757	Ig kappa chain V-III region VH (Fragment) OS=Homo sapiens PE=4 SV=1
O00187	MASP2_HUMAN	125.97	3	3	1.16279	1.12121	1.3	1.27907		75702	Mannan-binding lectin serine protease 2 OS=Homo sapiens GN=MASP2 PE=1 SV=4
P02654	APOC1_HUMAN	125.02	2	2	9.67442	10.2424	7.8	1.46512		9332	Apolipoprotein C-I OS=Homo sapiens GN=APOC1 PE=1 SV=1
P62158	CALM_HUMAN	123.66	2	2	4.09302	3.66667	5.5	0.604651	Deamidation only N	16838	Calmodulin OS=Homo sapiens GN=CALM1 PE=1 SV=2
P01699	LV101_HUMAN	123.58	4	4	1.90698	1.51515	3.2	0.209302	Carbamidomethylation; Deamidation only N	11515	Ig lambda chain V-I region VOR OS=Homo sapiens PE=1 SV=1
Q9UK55	ZPI_HUMAN	122.96	4	4	0.767442	0.575758	1.4	0.488372	Carbamidomethylation	50707	Protein Z-dependent protease inhibitor OS=Homo sapiens GN=SERPINA10 PE=1 SV=1
P05164	PERM_HUMAN	122.22	3	3	0.186047	0.242424	0	0.0930233	Carbamidomethylation	83869	Myeloperoxidase OS=Homo sapiens GN=MPO PE=1 SV=1
Q9NQC3	RTN4_HUMAN	119.89	2	2	0.139535	0.0909091	0.3	0.0697674		129931	Reticulon-4 OS=Homo sapiens GN=RTN4 PE=1 SV=2
P80419	HV322_HUMAN	119.86	2	2	8.76744	8.72727	8.9	1.4186	Carbamidomethylation	13087	Ig heavy chain V-III region GAR OS=Homo sapiens PE=1 SV=1
P07359	GP1BA_HUMAN	119.64	4	4	0.325581	0.212121	0.7	0.116279	Carbamidomethylation	68955	Platelet glycoprotein Ib alpha chain OS=Homo sapiens GN=GP1BA PE=1 SV=1
P26641	EF1G_HUMAN	119.54	1	1	0.116279	0.151515	0	0.0232558	Carbamidomethylation	50119	Elongation factor 1-gamma OS=Homo sapiens GN=EEF1G PE=1 SV=3
Q0ZGT2	NEXN_HUMAN	119.07	3	3	0.139535	0.121212	0.2	0.0697674	Carbamidomethylation; Oxidation (M); Deamidation only N	80658	Nexilin OS=Homo sapiens GN=NEXN PE=1 SV=1
P06889	LV405_HUMAN	118.26	1	1	17.8605	18.9091	14.4	1.60465	Carbamidomethylation	11272	Ig lambda chain V-IV region MOL OS=Homo sapiens PE=1 SV=1
P01605	KV113_HUMAN	117.13	2	1	14.5349	13.6667	17.4	2.83721		11834	Ig kappa chain V-I region Lay OS=Homo sapiens PE=1 SV=1
P26038	MOES_HUMAN	115.88	3	3	0.55814	0.575758	0.5	0.325581		67820	Moesin OS=Homo sapiens GN=MSN PE=1 SV=3
P15169	CBPN_HUMAN	115.36	3	3	1.16279	1.15152	1.2	0.837209	Carbamidomethylation	52286	Carboxypeptidase N catalytic chain OS=Homo sapiens GN=CPN1 PE=1 SV=1
P03951	FA11_HUMAN	115.27	4	4	0.209302	0.181818	0.3	0.139535	Carbamidomethylation	70109	Coagulation factor XI OS=Homo sapiens GN=F11 PE=1 SV=1
Q9NZN3	EHD3_HUMAN	115.01	2	2	0.325581	0.363636	0.2	0.27907		60887	EH domain-containing protein 3 OS=Homo sapiens GN=EHD3 PE=1 SV=2
P83593	KV405_HUMAN	112.7	2	1	3.4186	4.12121	1.1	0.325581		12060	Ig kappa chain V-IV region STH (Fragment) OS=Homo sapiens PE=1 SV=1
P07237	PDIA1_HUMAN	112.63	2	2	0.767442	0.424242	1.9	0.186047		57116	Protein disulfide-isomerase OS=Homo sapiens GN=P4HB PE=1 SV=3
P55058	PLTP_HUMAN	111.93	2	2	0.976744	1.12121	0.5	0.790698	Carbamidomethylation; Deamidation only N	54739	Phospholipid transfer protein OS=Homo sapiens GN=PLTP PE=1 SV=1
P52209	6PGD_HUMAN	111.66	2	2	0.651163	0.606061	0.8	0.186047	Carbamidomethylation	53140	6-phosphogluconate dehydrogenase decarboxylating OS=Homo sapiens GN=PGD PE=1 SV=3
P01603	KV111_HUMAN	110.81	2	2	3.2093	3.51515	2.2	0.395349		11900	Ig kappa chain V-I region Ka OS=Homo sapiens PE=1 SV=1
P01780	HV319_HUMAN	110.49	1	1	16.6047	16.4848	17	4.88372		12563	Ig heavy chain V-III region JON OS=Homo sapiens PE=1 SV=1
P49913	CAMP_HUMAN	109.92	2	2	3.2093	3.63636	1.8	0.860465	Carbamidomethylation	19301	Cathelicidin antimicrobial peptide OS=Homo sapiens GN=CAMP PE=1 SV=1
P01771	HV310_HUMAN	108.61	2	1	3.72093	3.54545	4.3	0.627907	Carbamidomethylation	13566	Ig heavy chain V-III region HIL OS=Homo sapiens PE=1 SV=1
P24844	MYL9_HUMAN	107.61	2	2	1.95349	1.81818	2.4	0.534884	Carbamidomethylation	19827	Myosin regulatory light polypeptide 9 OS=Homo sapiens GN=MYL9 PE=1 SV=4
P62820	RAB1A_HUMAN	107.33	2	2	0.372093	0.242424	0.8	0.0465116		22678	Ras-related protein Rab-1A OS=Homo sapiens GN=RAB1A PE=1 SV=3
P32119	PRDX2_HUMAN	107.25	3	3	0.488372	0.363636	0.9	0.0697674		21892	Peroxiredoxin-2 OS=Homo sapiens GN=PRDX2 PE=1 SV=5
Q15485	FCN2_HUMAN	107.23	1	1	3.53488	3.63636	3.2	1.55814		34001	Ficolin-2 OS=Homo sapiens GN=FCN2 PE=1 SV=2
P06317	LV603_HUMAN	107.16	2	2	2.76744	0.848485	9.1	0.255814	Carbamidomethylation; Oxidation (M)	12247	Ig lambda chain V-VI region SUT OS=Homo sapiens PE=1 SV=1
Q8N257	H2B3B_HUMAN	106.98	2	2	0.27907	0.363636	0	0.0465116		13908	Histone H2B type 3-B OS=Homo sapiens GN=HIST3H2BB PE=1 SV=3
Q99880	H2B1L_HUMAN	106.98	2	2	0.27907	0.363636	0	0.0465116		13952	Histone H2B type 1-L OS=Homo sapiens GN=HIST1H2BL PE=1 SV=3
Q99877	H2B1N_HUMAN	106.98	2	2	0.27907	0.363636	0	0.0465116		13922	Histone H2B type 1-N OS=Homo sapiens GN=HIST1H2BN PE=1 SV=3
P33778	H2B1B_HUMAN	106.98	2	2	0.27907	0.363636	0	0.0465116		13950	Histone H2B type 1-B OS=Homo sapiens GN=HIST1H2BB PE=1 SV=2
Q93079	H2B1H_HUMAN	106.98	2	2	0.27907	0.363636	0	0.0465116		13892	Histone H2B type 1-H OS=Homo sapiens GN=HIST1H2BH PE=1 SV=3
P57053	H2BFS_HUMAN	106.98	2	2	0.27907	0.363636	0	0.0465116		13944	Histone H2B type F-S OS=Homo sapiens GN=H2BFS PE=1 SV=2
O60814	H2B1K_HUMAN	106.98	2	2	0.27907	0.363636	0	0.0465116		13890	Histone H2B type 1-K OS=Homo sapiens GN=HIST1H2BK PE=1 SV=3
P58876	H2B1D_HUMAN	106.98	2	2	0.27907	0.363636	0	0.0465116		13936	Histone H2B type 1-D OS=Homo sapiens GN=HIST1H2BD PE=1 SV=2
P62807	H2B1C_HUMAN	106.98	2	2	0.27907	0.363636	0	0.0465116		13906	Histone H2B type 1-C/E/F/G/I OS=Homo sapiens GN=HIST1H2BC PE=1 SV=4
Q99879	H2B1M_HUMAN	106.98	2	2	0.27907	0.363636	0	0.0465116		13989	Histone H2B type 1-M OS=Homo sapiens GN=HIST1H2BM PE=1 SV=3
Q5QNW6	H2B2F_HUMAN	106.98	2	2	0.27907	0.363636	0	0.0465116		13920	Histone H2B type 2-F OS=Homo sapiens GN=HIST2H2BF PE=1 SV=3
P23527	H2B1O_HUMAN	106.98	2	2	0.27907	0.363636	0	0.0465116		13906	Histone H2B type 1-O OS=Homo sapiens GN=HIST1H2BO PE=1 SV=3
P06899	H2B1J_HUMAN	106.98	2	2	0.27907	0.363636	0	0.0465116		13904	Histone H2B type 1-J OS=Homo sapiens GN=HIST1H2BJ PE=1 SV=3
Q16778	H2B2E_HUMAN	106.98	2	2	0.27907	0.363636	0	0.0465116		13920	Histone H2B type 2-E OS=Homo sapiens GN=HIST2H2BE PE=1 SV=3
Q9H299	SH3L3_HUMAN	104.7	2	2	5.16279	4.24242	8.2	0.395349		10438	SH3 domain-binding glutamic acid-rich-like protein 3 OS=Homo sapiens GN=SH3BGRL3 PE=1 SV=1
P98160	PGBM_HUMAN	104.27	3	3	0.0232558	0.030303	0	0.162791	Carbamidomethylation	468835	Basement membrane-specific heparan sulfate proteoglycan core protein OS=Homo sapiens GN=HSPG2 PE=1 SV=4
P01712	LV209_HUMAN	104.2	3	2	1.48837	1.57576	1.2	0.116279		11694	Ig lambda chain V-II region WIN OS=Homo sapiens PE=1 SV=1
P06733	ENOA_HUMAN	103.09	2	2	0.348837	0.454545	0	0.116279		47169	Alpha-enolase OS=Homo sapiens GN=ENO1 PE=1 SV=2
P01701	LV103_HUMAN	102.38	2	2	4.46512	4.72727	3.6	0.604651		11453	Ig lambda chain V-I region NEW OS=Homo sapiens PE=1 SV=1
Q00610	CLH1_HUMAN	102.04	2	2	0.116279	0.121212	0.1	0.186047		191613	Clathrin heavy chain 1 OS=Homo sapiens GN=CLTC PE=1 SV=5
P47756	CAPZB_HUMAN	101.81	2	2	0.930233	0.636364	1.9	0.209302		31350	F-actin-capping protein subunit beta OS=Homo sapiens GN=CAPZB PE=1 SV=4
P01705	LV202_HUMAN	101.15	3	3	1.97674	2.57576	0	0.139535	Oxidation (M); Deamidation only N	11591	Ig lambda chain V-II region NEI OS=Homo sapiens PE=1 SV=1
P50395	GDIB_HUMAN	100.6	2	2	0.0930233	0.121212	0	0.0232558		50663	Rab GDP dissociation inhibitor beta OS=Homo sapiens GN=GDI2 PE=1 SV=2
Q14315	FLNC_HUMAN	100.13	2	1	0	0	0	0.232558		291020	Filamin-C OS=Homo sapiens GN=FLNC PE=1 SV=3
Q8IZF2	GP116_HUMAN	100.04	2	2	0.0465116	0.030303	0.1	0.0465116	Carbamidomethylation	149457	Probable G-protein coupled receptor 116 OS=Homo sapiens GN=GPR116 PE=1 SV=3
P12931	SRC_HUMAN	99.56	2	2	0.348837	0.242424	0.7	0.209302		59835	Proto-oncogene tyrosine-protein kinase Src OS=Homo sapiens GN=SRC PE=1 SV=3
P01602	KV110_HUMAN	99.31	1	1	3.5814	3.39394	4.2	0.511628		12768	Ig kappa chain V-I region HK102 (Fragment) OS=Homo sapiens GN=IGKV1-5 PE=4 SV=1
Q16643	DREB_HUMAN	97.92	2	2	0.232558	0.30303	0	0.0930233		71429	Drebrin OS=Homo sapiens GN=DBN1 PE=1 SV=4
Q9UKY7	CDV3_HUMAN	97.71	1	1	4.4186	4.60606	3.8	0.255814		27335	Protein CDV3 homolog OS=Homo sapiens GN=CDV3 PE=1 SV=1
Q9UDY2	ZO2_HUMAN	97.62	2	2	0.0232558	0.030303	0	0.0232558		133958	Tight junction protein ZO-2 OS=Homo sapiens GN=TJP2 PE=1 SV=2
Q14847	LASP1_HUMAN	97.53	3	3	0.232558	0.151515	0.5	0.0465116		29717	LIM and SH3 domain protein 1 OS=Homo sapiens GN=LASP1 PE=1 SV=2
Q9H0U4	RAB1B_HUMAN	96.17	2	2	0.534884	0.454545	0.8	0.0697674		22171	Ras-related protein Rab-1B OS=Homo sapiens GN=RAB1B PE=1 SV=1
O94919	ENDD1_HUMAN	96.06	1	1	0.651163	0.848485	0	0.162791		55017	Endonuclease domain-containing 1 protein OS=Homo sapiens GN=ENDOD1 PE=1 SV=2
O14604	TYB4Y_HUMAN	95	1	1	0.906977	1.18182	0	0.0465116		5013	Thymosin beta-4 Y-chromosomal OS=Homo sapiens GN=TMSB4Y PE=2 SV=3
P16070	CD44_HUMAN	94.44	1	1	0.976744	0.969697	1	0.837209		81538	CD44 antigen OS=Homo sapiens GN=CD44 PE=1 SV=3
P11226	MBL2_HUMAN	93.51	1	1	0.232558	0	1	0.0697674	Carbamidomethylation	26144	Mannose-binding protein C OS=Homo sapiens GN=MBL2 PE=1 SV=2
P21291	CSRP1_HUMAN	92.92	1	1	3.53488	4.12121	1.6	0.627907		20567	Cysteine and glycine-rich protein 1 OS=Homo sapiens GN=CSRP1 PE=1 SV=3
P22692	IBP4_HUMAN	92.63	1	1	1.30233	0.636364	3.5	0.255814	Carbamidomethylation	27934	Insulin-like growth factor-binding protein 4 OS=Homo sapiens GN=IGFBP4 PE=1 SV=2
Q9Y623	MYH4_HUMAN	92.61	3	2	0.0232558	0.030303	0	0.0697674	Carbamidomethylation	223069	Myosin-4 OS=Homo sapiens GN=MYH4 PE=1 SV=2
Q8TEA8	DTD1_HUMAN	92.5	1	1	2.97674	3.15152	2.4	0.581395		23424	D-tyrosyl-tRNA(Tyr) deacylase 1 OS=Homo sapiens GN=DTD1 PE=1 SV=2
P60953	CDC42_HUMAN	91.82	2	2	0.348837	0.30303	0.5	0.0930233	Carbamidomethylation	21259	Cell division control protein 42 homolog OS=Homo sapiens GN=CDC42 PE=1 SV=2
P78417	GSTO1_HUMAN	91.18	2	2	0.325581	0.424242	0	0.0697674		27566	Glutathione S-transferase omega-1 OS=Homo sapiens GN=GSTO1 PE=1 SV=2
P01716	LV402_HUMAN	89.29	1	1	2.23256	1.45455	4.8	0.27907	Carbamidomethylation	11334	Ig lambda chain V-IV region X OS=Homo sapiens PE=1 SV=1
Q15084	PDIA6_HUMAN	88.99	2	2	0.418605	0.454545	0.3	0.162791		48121	Protein disulfide-isomerase A6 OS=Homo sapiens GN=PDIA6 PE=1 SV=1
P01344	IGF2_HUMAN	88.02	2	2	0.418605	0.363636	0.6	0.162791	Carbamidomethylation	20140	Insulin-like growth factor II OS=Homo sapiens GN=IGF2 PE=1 SV=1
P04211	LV001_HUMAN	87.59	2	2	4.09302	4.36364	3.2	0.767442		12380	Ig lambda chain V region 4A OS=Homo sapiens PE=4 SV=1
P16671	CD36_HUMAN	87.4	2	2	0.139535	0	0.6	0.0697674	Carbamidomethylation	53053	Platelet glycoprotein 4 OS=Homo sapiens GN=CD36 PE=1 SV=2
P22392	NDKB_HUMAN	86.86	2	2	0.27907	0.363636	0	0.0465116	Carbamidomethylation	17298	Nucleoside diphosphate kinase B OS=Homo sapiens GN=NME2 PE=1 SV=1
O60361	NDK8_HUMAN	86.86	2	2	0.325581	0.424242	0	0.0465116	Carbamidomethylation	15529	Putative nucleoside diphosphate kinase OS=Homo sapiens GN=NME2P1 PE=5 SV=1
P15531	NDKA_HUMAN	86.86	2	2	0.27907	0.363636	0	0.0465116	Carbamidomethylation	17149	Nucleoside diphosphate kinase A OS=Homo sapiens GN=NME1 PE=1 SV=1
P13747	HLAE_HUMAN	86.55	2	1	0.372093	0.484848	0	0.139535		40157	HLA class I histocompatibility antigen alpha chain E OS=Homo sapiens GN=HLA-E PE=1 SV=3
Q9H4G4	GAPR1_HUMAN	85.83	2	2	0.930233	0.484848	2.4	0.116279		17218	Golgi-associated plant pathogenesis-related protein 1 OS=Homo sapiens GN=GLIPR2 PE=1 SV=3
O75015	FCG3B_HUMAN	85.5	2	2	0.116279	0	0.5	0.0465116	Carbamidomethylation	26216	Low affinity immunoglobulin gamma Fc region receptor III-B OS=Homo sapiens GN=FCGR3B PE=1 SV=2
O15511	ARPC5_HUMAN	85.43	1	1	3.74419	3.48485	4.6	0.255814	Carbamidomethylation	16320	Actin-related protein 2/3 complex subunit 5 OS=Homo sapiens GN=ARPC5 PE=1 SV=3
P08779	K1C16_HUMAN	84.6	2	1	0.116279	0	0.5	0.0697674	Carbamidomethylation	51268	Keratin type I cytoskeletal 16 OS=Homo sapiens GN=KRT16 PE=1 SV=4
P02533	K1C14_HUMAN	84.6	2	1	0.116279	0	0.5	0.0697674	Carbamidomethylation	51562	Keratin type I cytoskeletal 14 OS=Homo sapiens GN=KRT14 PE=1 SV=4
P18669	PGAM1_HUMAN	84.12	2	2	0.325581	0	1.4	0.0465116	Carbamidomethylation	28804	Phosphoglycerate mutase 1 OS=Homo sapiens GN=PGAM1 PE=1 SV=2
P25705	ATPA_HUMAN	83.65	2	2	0.139535	0.0909091	0.3	0.0465116		59751	ATP synthase subunit alpha mitochondrial OS=Homo sapiens GN=ATP5A1 PE=1 SV=1
P52907	CAZA1_HUMAN	83.08	2	2	0.209302	0.181818	0.3	0.0465116		32923	F-actin-capping protein subunit alpha-1 OS=Homo sapiens GN=CAPZA1 PE=1 SV=3
P55072	TERA_HUMAN	82.03	2	2	0.0930233	0.0606061	0.2	0.0465116	Carbamidomethylation	89322	Transitional endoplasmic reticulum ATPase OS=Homo sapiens GN=VCP PE=1 SV=4
P10412	H14_HUMAN	81.7	2	2	0.302326	0.393939	0	0.0697674		21865	Histone H1.4 OS=Homo sapiens GN=HIST1H1E PE=1 SV=2
P16403	H12_HUMAN	81.7	2	2	0.302326	0.393939	0	0.0697674		21365	Histone H1.2 OS=Homo sapiens GN=HIST1H1C PE=1 SV=2
P16402	H13_HUMAN	81.7	2	2	0.302326	0.393939	0	0.0697674		22350	Histone H1.3 OS=Homo sapiens GN=HIST1H1D PE=1 SV=2
P01601	KV109_HUMAN	81.67	1	1	2.27907	1.69697	4.2	0.209302		12800	Ig kappa chain V-I region HK101 (Fragment) OS=Homo sapiens PE=4 SV=1
Q8NBS9	TXND5_HUMAN	81.52	1	1	0.186047	0.242424	0	0.0465116	Carbamidomethylation	47629	Thioredoxin domain-containing protein 5 OS=Homo sapiens GN=TXNDC5 PE=1 SV=2
P01778	HV317_HUMAN	81.38	1	1	4.09302	3.39394	6.4	0.372093		12582	Ig heavy chain V-III region ZAP OS=Homo sapiens PE=1 SV=1
O95866	G6B_HUMAN	80.02	2	2	0.27907	0.363636	0	0.0465116	Carbamidomethylation	26163	Protein G6b OS=Homo sapiens GN=G6B PE=1 SV=1
Q16270	IBP7_HUMAN	79.9	1	1	0.651163	0.636364	0.7	0.116279	Carbamidomethylation	29130	Insulin-like growth factor-binding protein 7 OS=Homo sapiens GN=IGFBP7 PE=1 SV=1
P18428	LBP_HUMAN	79.03	2	2	0.255814	0.181818	0.5	0.0697674	Carbamidomethylation	53384	Lipopolysaccharide-binding protein OS=Homo sapiens GN=LBP PE=1 SV=3
O43294	TGFI1_HUMAN	78.6	1	1	0.186047	0.242424	0	0.0697674	Carbamidomethylation	49814	Transforming growth factor beta-1-induced transcript 1 protein OS=Homo sapiens GN=TGFB1I1 PE=1 SV=2
Q01433	AMPD2_HUMAN	76.97	1	1	0.0697674	0.0909091	0	0.0697674		100688	AMP deaminase 2 OS=Homo sapiens GN=AMPD2 PE=1 SV=2
P01709	LV206_HUMAN	76.81	2	1	0.72093	0.575758	1.2	0.0465116		11558	Ig lambda chain V-II region MGC OS=Homo sapiens PE=1 SV=1
O14950	ML12B_HUMAN	76.76	1	1	2.65116	3.09091	1.2	0.627907	Deamidation only N	19779	Myosin regulatory light chain 12B OS=Homo sapiens GN=MYL12B PE=1 SV=2
P19105	ML12A_HUMAN	76.76	1	1	2.65116	3.09091	1.2	0.627907	Deamidation only N	19794	Myosin regulatory light chain 12A OS=Homo sapiens GN=MYL12A PE=1 SV=2
Q9H4X1	RGC32_HUMAN	76.66	1	1	1.11628	1.45455	0	0.0930233		14559	Response gene to complement 32 protein OS=Homo sapiens GN=RGC32 PE=1 SV=1
A6NL28	TPM3L_HUMAN	76.35	1	1	1.86047	1.69697	2.4	0.325581		26269	Putative tropomyosin alpha-3 chain-like protein OS=Homo sapiens PE=5 SV=2
P05451	REG1A_HUMAN	76.3	1	1	0.162791	0.212121	0	0.0465116	Carbamidomethylation	18731	Lithostathine-1-alpha OS=Homo sapiens GN=REG1A PE=1 SV=3
P48304	REG1B_HUMAN	76.3	1	1	0.162791	0.212121	0	0.0465116	Carbamidomethylation	18665	Lithostathine-1-beta OS=Homo sapiens GN=REG1B PE=1 SV=1
P53801	PTTG_HUMAN	76.17	1	1	0.651163	0.848485	0	0.116279		20324	Pituitary tumor-transforming gene 1 protein-interacting protein OS=Homo sapiens GN=PTTG1IP PE=1 SV=1
P17301	ITA2_HUMAN	75.64	1	1	0.0465116	0.0606061	0	0.0232558		129295	Integrin alpha-2 OS=Homo sapiens GN=ITGA2 PE=1 SV=1
P06311	KV311_HUMAN	75.33	1	1	0.27907	0.363636	0	0.0465116		14070	Ig kappa chain V-III region IARC/BL41 OS=Homo sapiens PE=1 SV=1
P13647	K2C5_HUMAN	74.84	2	1	0.0697674	0	0.3	0.0465116	Carbamidomethylation	62378	Keratin type II cytoskeletal 5 OS=Homo sapiens GN=KRT5 PE=1 SV=3
P05109	S10A8_HUMAN	73.89	1	1	0.55814	0.363636	1.2	0.0697674	Carbamidomethylation	10835	Protein S100-A8 OS=Homo sapiens GN=S100A8 PE=1 SV=1
P13796	PLSL_HUMAN	73.87	1	1	0.325581	0.30303	0.4	0.186047	Carbamidomethylation	70289	Plastin-2 OS=Homo sapiens GN=LCP1 PE=1 SV=6
Q9BR76	COR1B_HUMAN	70.7	1	1	0.55814	0.727273	0	0.0930233		54235	Coronin-1B OS=Homo sapiens GN=CORO1B PE=1 SV=1
Q9HDC9	APMAP_HUMAN	70.66	2	2	0.0697674	0.0909091	0	0.0232558	Carbamidomethylation	46480	Adipocyte plasma membrane-associated protein OS=Homo sapiens GN=APMAP PE=1 SV=2
P61026	RAB10_HUMAN	67.28	1	1	0.27907	0.363636	0	0.0465116		22541	Ras-related protein Rab-10 OS=Homo sapiens GN=RAB10 PE=1 SV=1
P05362	ICAM1_HUMAN	66.85	1	1	0.209302	0	0.9	0.0930233	Deamidation only N	57825	Intercellular adhesion molecule 1 OS=Homo sapiens GN=ICAM1 PE=1 SV=2
P24592	IBP6_HUMAN	66.17	1	1	0.55814	0.727273	0	0.0697674	Carbamidomethylation	25322	Insulin-like growth factor-binding protein 6 OS=Homo sapiens GN=IGFBP6 PE=1 SV=1
Q9UM47	NOTC3_HUMAN	65.81	1	1	0.0465116	0.030303	0.1	0.0465116	Carbamidomethylation	243629	Neurogenic locus notch homolog protein 3 OS=Homo sapiens GN=NOTCH3 PE=1 SV=2
P06576	ATPB_HUMAN	65.8	1	1	0.0697674	0.0909091	0	0.0232558		56560	ATP synthase subunit beta mitochondrial OS=Homo sapiens GN=ATP5B PE=1 SV=3
P31948	STIP1_HUMAN	65.54	1	1	0.0697674	0	0.3	0.0232558	Carbamidomethylation	62639	Stress-induced-phosphoprotein 1 OS=Homo sapiens GN=STIP1 PE=1 SV=1
P00918	CAH2_HUMAN	65.01	1	1	0.0930233	0	0.4	0.0232558		29246	Carbonic anhydrase 2 OS=Homo sapiens GN=CA2 PE=1 SV=2
P01715	LV401_HUMAN	65	1	1	0.186047	0	0.8	0.0465116		11306	Ig lambda chain V-IV region Bau OS=Homo sapiens PE=1 SV=1
P00491	PNPH_HUMAN	64.15	1	1	0.930233	1.06061	0.5	0.27907		32118	Purine nucleoside phosphorylase OS=Homo sapiens GN=PNP PE=1 SV=2
P55290	CAD13_HUMAN	64.1	1	1	0.139535	0.121212	0.2	0.0930233		78287	Cadherin-13 OS=Homo sapiens GN=CDH13 PE=1 SV=1
P30043	BLVRB_HUMAN	63.9	1	1	0.627907	0.818182	0	0.116279	Carbamidomethylation	22119	Flavin reductase OS=Homo sapiens GN=BLVRB PE=1 SV=3
P52566	GDIR2_HUMAN	63.74	1	1	0.232558	0.30303	0	0.0232558		22988	Rho GDP-dissociation inhibitor 2 OS=Homo sapiens GN=ARHGDIB PE=1 SV=3
P29401	TKT_HUMAN	62.96	1	1	0.0697674	0.0909091	0	0.0232558		67878	Transketolase OS=Homo sapiens GN=TKT PE=1 SV=3
P10645	CMGA_HUMAN	62.78	1	1	0.27907	0.242424	0.4	0.0930233		50688	Chromogranin-A OS=Homo sapiens GN=CHGA PE=1 SV=7
Q9BUN1	CA056_HUMAN	61.97	1	1	1.02326	0.969697	1.2	0.255814	Carbamidomethylation	36769	Uncharacterized protein C1orf56 OS=Homo sapiens GN=C1orf56 PE=1 SV=1
Q99952	PTN18_HUMAN	61.75	1	1	0.116279	0	0.5	0.0465116		50482	Tyrosine-protein phosphatase non-receptor type 18 OS=Homo sapiens GN=PTPN18 PE=1 SV=2
P61586	RHOA_HUMAN	61.51	1	1	0.976744	0.909091	1.2	0.232558		21768	Transforming protein RhoA OS=Homo sapiens GN=RHOA PE=1 SV=1
O15145	ARPC3_HUMAN	61.15	1	1	0.418605	0.363636	0.6	0.0697674		20547	Actin-related protein 2/3 complex subunit 3 OS=Homo sapiens GN=ARPC3 PE=1 SV=3
P08253	MMP2_HUMAN	61.1	1	1	0.0930233	0.0606061	0.2	0.0465116	Carbamidomethylation	73882	72 kDa type IV collagenase OS=Homo sapiens GN=MMP2 PE=1 SV=2
P30405	PPIF_HUMAN	60.98	1	1	0.232558	0.30303	0	0.0232558	Carbamidomethylation	22040	Peptidyl-prolyl cis-trans isomerase F mitochondrial OS=Homo sapiens GN=PPIF PE=1 SV=1
Q96HR3	MED30_HUMAN	60.66	1	1	0.232558	0.30303	0	0.0465116		20277	Mediator of RNA polymerase II transcription subunit 30 OS=Homo sapiens GN=MED30 PE=1 SV=1
P01615	KV202_HUMAN	60.64	1	1	1.13953	0.848485	2.1	0.27907		12660	Ig kappa chain V-II region FR OS=Homo sapiens PE=1 SV=1
P48426	PI42A_HUMAN	60.31	1	1	0.0697674	0	0.3	0.0232558		46225	Phosphatidylinositol-5-phosphate 4-kinase type-2 alpha OS=Homo sapiens GN=PIP4K2A PE=1 SV=2
Q07960	RHG01_HUMAN	60.29	1	1	0.0930233	0	0.4	0.0232558		50436	Rho GTPase-activating protein 1 OS=Homo sapiens GN=ARHGAP1 PE=1 SV=1
P42166	LAP2A_HUMAN	60.15	1	1	0.209302	0.0909091	0.6	0.116279	Deamidation only N	75492	Lamina-associated polypeptide 2 isoform alpha OS=Homo sapiens GN=TMPO PE=1 SV=2
P23229	ITA6_HUMAN	59.76	1	1	0.0232558	0.030303	0	0.0232558	Carbamidomethylation; Deamidation only N	126632	Integrin alpha-6 OS=Homo sapiens GN=ITGA6 PE=1 SV=4
Q9UJU6	DBNL_HUMAN	59.67	1	1	0.0697674	0.0909091	0	0.0465116		48207	Drebrin-like protein OS=Homo sapiens GN=DBNL PE=1 SV=1
O00429	DNM1L_HUMAN	59.63	1	1	0.139535	0.0909091	0.3	0.0465116		81877	Dynamin-1-like protein OS=Homo sapiens GN=DNM1L PE=1 SV=2
Q07075	AMPE_HUMAN	59.47	1	1	0.0232558	0.030303	0	0.0465116		109244	Glutamyl aminopeptidase OS=Homo sapiens GN=ENPEP PE=1 SV=3
Q7Z7M0	MEGF8_HUMAN	59.41	1	1	0	0	0	0.0465116		303100	Multiple epidermal growth factor-like domains protein 8 OS=Homo sapiens GN=MEGF8 PE=1 SV=2
O14498	ISLR_HUMAN	59.36	1	1	0.0697674	0.0909091	0	0.0232558		45997	Immunoglobulin superfamily containing leucine-rich repeat protein OS=Homo sapiens GN=ISLR PE=1 SV=1
P07203	GPX1_HUMAN	59.16	1	1	0.209302	0.272727	0	0.0232558		22088	Glutathione peroxidase 1 OS=Homo sapiens GN=GPX1 PE=1 SV=4
P01708	LV205_HUMAN	58.87	1	1	0.232558	0	1	0.0232558		11506	Ig lambda chain V-II region BUR OS=Homo sapiens PE=1 SV=1
P29122	PCSK6_HUMAN	58.61	1	1	0.0232558	0.030303	0	0.0232558	Carbamidomethylation	106420	Proprotein convertase subtilisin/kexin type 6 OS=Homo sapiens GN=PCSK6 PE=1 SV=1
Q9NQ79	CRAC1_HUMAN	58.58	1	1	0.0465116	0.0606061	0	0.0232558	Carbamidomethylation	71421	Cartilage acidic protein 1 OS=Homo sapiens GN=CRTAC1 PE=1 SV=2
P08311	CATG_HUMAN	58.08	1	1	0.0930233	0.121212	0	0.0232558		28837	Cathepsin G OS=Homo sapiens GN=CTSG PE=1 SV=2
P13667	PDIA4_HUMAN	57.27	1	1	0.0465116	0	0.2	0.0232558		72933	Protein disulfide-isomerase A4 OS=Homo sapiens GN=PDIA4 PE=1 SV=2
P08493	MGP_HUMAN	56.82	1	1	1.53488	2	0	0.162791		12353	Matrix Gla protein OS=Homo sapiens GN=MGP PE=1 SV=2
Q9Y4B4	ARIP4_HUMAN	56.19	1	1	0	0	0	0.0232558		162768	Helicase ARIP4 OS=Homo sapiens GN=RAD54L2 PE=1 SV=4
P01710	LV207_HUMAN	55.4	1	1	0.44186	0.575758	0	0.0232558		11785	Ig lambda chain V-II region BO OS=Homo sapiens PE=1 SV=1
P57721	PCBP3_HUMAN	55.35	1	1	0.0697674	0	0.3	0.0232558	Carbamidomethylation	39465	Poly(rC)-binding protein 3 OS=Homo sapiens GN=PCBP3 PE=1 SV=2
Q15365	PCBP1_HUMAN	55.35	1	1	0.0697674	0	0.3	0.0232558	Carbamidomethylation	37498	Poly(rC)-binding protein 1 OS=Homo sapiens GN=PCBP1 PE=1 SV=2
Q15366	PCBP2_HUMAN	55.35	1	1	0.0697674	0	0.3	0.0232558	Carbamidomethylation	38580	Poly(rC)-binding protein 2 OS=Homo sapiens GN=PCBP2 PE=1 SV=1
P16104	H2AX_HUMAN	55.09	1	1	0.837209	1.09091	0	0.186047		15145	Histone H2A.x OS=Homo sapiens GN=H2AFX PE=1 SV=2
P04908	H2A1B_HUMAN	55.09	1	1	0.976744	1.27273	0	0.186047		14135	Histone H2A type 1-B/E OS=Homo sapiens GN=HIST1H2AB PE=1 SV=2
Q93077	H2A1C_HUMAN	55.09	1	1	0.976744	1.27273	0	0.186047		14105	Histone H2A type 1-C OS=Homo sapiens GN=HIST1H2AC PE=1 SV=3
Q7L7L0	H2A3_HUMAN	55.09	1	1	0.976744	1.27273	0	0.186047		14121	Histone H2A type 3 OS=Homo sapiens GN=HIST3H2A PE=1 SV=3
Q99878	H2A1J_HUMAN	55.09	1	1	0.976744	1.27273	0	0.186047		13936	Histone H2A type 1-J OS=Homo sapiens GN=HIST1H2AJ PE=1 SV=3
Q96KK5	H2A1H_HUMAN	55.09	1	1	0.976744	1.27273	0	0.186047		13906	Histone H2A type 1-H OS=Homo sapiens GN=HIST1H2AH PE=1 SV=3
Q9BTM1	H2AJ_HUMAN	55.09	1	1	0.976744	1.27273	0	0.186047		14019	Histone H2A.J OS=Homo sapiens GN=H2AFJ PE=1 SV=1
P20671	H2A1D_HUMAN	55.09	1	1	0.976744	1.27273	0	0.186047		14107	Histone H2A type 1-D OS=Homo sapiens GN=HIST1H2AD PE=1 SV=2
P0C0S8	H2A1_HUMAN	55.09	1	1	0.976744	1.27273	0	0.186047		14091	Histone H2A type 1 OS=Homo sapiens GN=HIST1H2AG PE=1 SV=2
Q8IUE6	H2A2B_HUMAN	55.09	1	1	0.976744	1.27273	0	0.186047		13995	Histone H2A type 2-B OS=Homo sapiens GN=HIST2H2AB PE=1 SV=3
Q16777	H2A2C_HUMAN	55.09	1	1	0.976744	1.27273	0	0.186047		13988	Histone H2A type 2-C OS=Homo sapiens GN=HIST2H2AC PE=1 SV=4
Q6FI13	H2A2A_HUMAN	55.09	1	1	0.976744	1.27273	0	0.186047		14095	Histone H2A type 2-A OS=Homo sapiens GN=HIST2H2AA3 PE=1 SV=3
Q96QV6	H2A1A_HUMAN	55.09	1	1	0.976744	1.27273	0	0.186047		14233	Histone H2A type 1-A OS=Homo sapiens GN=HIST1H2AA PE=1 SV=3
P0C0S5	H2AZ_HUMAN	55.09	1	1	0.976744	1.27273	0	0.186047		13553	Histone H2A.Z OS=Homo sapiens GN=H2AFZ PE=1 SV=2
Q71UI9	H2AV_HUMAN	55.09	1	1	0.976744	1.27273	0	0.186047		13509	Histone H2A.V OS=Homo sapiens GN=H2AFV PE=1 SV=3
Q15691	MARE1_HUMAN	54.7	1	1	0.162791	0.212121	0	0.0232558		29999	Microtubule-associated protein RP/EB family member 1 OS=Homo sapiens GN=MAPRE1 PE=1 SV=3
Q96AQ1	CC74A_HUMAN	54.32	1	1	0.0465116	0.0606061	0	0.0232558		41605	Coiled-coil domain-containing protein 74A OS=Homo sapiens GN=CCDC74A PE=2 SV=1
Q96LY2	CC74B_HUMAN	54.32	1	1	0.0465116	0.0606061	0	0.0232558		41826	Coiled-coil domain-containing protein 74B OS=Homo sapiens GN=CCDC74B PE=2 SV=1
Q9NPY3	C1QR1_HUMAN	54.19	1	1	0.0697674	0.0909091	0	0.0232558	Carbamidomethylation	68560	Complement component C1q receptor OS=Homo sapiens GN=CD93 PE=1 SV=3
P51991	ROA3_HUMAN	53.9	1	1	0.139535	0.181818	0	0.0232558		39595	Heterogeneous nuclear ribonucleoprotein A3 OS=Homo sapiens GN=HNRNPA3 PE=1 SV=2
Q9BSL1	UBAC1_HUMAN	53.44	1	1	0.0465116	0.0606061	0	0.0232558		45338	Ubiquitin-associated domain-containing protein 1 OS=Homo sapiens GN=UBAC1 PE=1 SV=1
P37059	DHB2_HUMAN	53.3	1	1	0.139535	0.181818	0	0.0697674		42785	Estradiol 17-beta-dehydrogenase 2 OS=Homo sapiens GN=HSD17B2 PE=1 SV=1
P33151	CADH5_HUMAN	53.14	1	1	0.0930233	0.0909091	0.1	0.116279		87528	Cadherin-5 OS=Homo sapiens GN=CDH5 PE=1 SV=5
O15117	FYB_HUMAN	53.03	1	1	0.0465116	0.0606061	0	0.0232558		85387	FYN-binding protein OS=Homo sapiens GN=FYB PE=1 SV=2
P14151	LYAM1_HUMAN	52.98	1	1	0.139535	0.181818	0	0.0232558	Carbamidomethylation	42187	L-selectin OS=Homo sapiens GN=SELL PE=1 SV=2
A6NCJ1	CS071_HUMAN	52.94	1	1	0.0697674	0	0.3	0.0232558		24176	Uncharacterized protein C19orf71 OS=Homo sapiens GN=C19orf71 PE=4 SV=2
P19022	CADH2_HUMAN	52.76	1	1	0.0465116	0	0.2	0.0232558	Carbamidomethylation	99809	Cadherin-2 OS=Homo sapiens GN=CDH2 PE=1 SV=4
P50851	LRBA_HUMAN	52.7	1	1	0.0232558	0.030303	0	0.0232558	Carbamidomethylation	319107	Lipopolysaccharide-responsive and beige-like anchor protein OS=Homo sapiens GN=LRBA PE=1 SV=4
Q9NQ33	ASCL3_HUMAN	52.32	1	1	0.139535	0.181818	0	0.0232558		20797	Achaete-scute homolog 3 OS=Homo sapiens GN=ASCL3 PE=2 SV=2
P02771	FETA_HUMAN	51.76	1	1	0.27907	0.272727	0.3	0.0930233	Carbamidomethylation	68678	Alpha-fetoprotein OS=Homo sapiens GN=AFP PE=1 SV=1
Q63HK5	TSH3_HUMAN	51.74	1	1	0.0232558	0.030303	0	0.0232558		118566	Teashirt homolog 3 OS=Homo sapiens GN=TSHZ3 PE=1 SV=2
Q8WWN8	ARAP3_HUMAN	51.72	1	1	0	0	0	0.0465116		169843	Arf-GAP with Rho-GAP domain ANK repeat and PH domain-containing protein 3 OS=Homo sapiens GN=ARAP3 PE=1 SV=1
P55056	APOC4_HUMAN	51.64	1	1	0.27907	0.363636	0	0.0697674		14553	Apolipoprotein C-IV OS=Homo sapiens GN=APOC4 PE=1 SV=1
O75475	PSIP1_HUMAN	51.33	1	1	0.27907	0.363636	0	0.0465116	Oxidation (M); Deamidation only N	60103	PC4 and SFRS1-interacting protein OS=Homo sapiens GN=PSIP1 PE=1 SV=1
Q8NBF6	AVL9_HUMAN	51.32	1	1	0.0465116	0	0.2	0.0232558		71947	Late secretory pathway protein AVL9 homolog OS=Homo sapiens GN=AVL9 PE=1 SV=1
Q8TD57	DYH3_HUMAN	51.3	1	1	0	0	0	0.0232558	Deamidation only N	470774	Dynein heavy chain 3 axonemal OS=Homo sapiens GN=DNAH3 PE=2 SV=1
P01762	HV301_HUMAN	51.19	1	1	0.372093	0	1.6	0.0232558		13472	Ig heavy chain V-III region TRO OS=Homo sapiens PE=1 SV=1
P07900	HS90A_HUMAN	51.16	1	1	0.116279	0.151515	0	0.0232558		84660	Heat shock protein HSP 90-alpha OS=Homo sapiens GN=HSP90AA1 PE=1 SV=5
P01619	KV301_HUMAN	51.05	1	1	0.976744	1.27273	0	0.0465116		11635	Ig kappa chain V-III region B6 OS=Homo sapiens PE=1 SV=1
Q6ZU65	UBN2_HUMAN	50.21	1	1	0.0232558	0.030303	0	0.0232558		146088	Ubinuclein-2 OS=Homo sapiens GN=UBN2 PE=1 SV=2
Q99969	RARR2_HUMAN	50.02	1	1	0.162791	0.212121	0	0.0232558	Carbamidomethylation	18618	Retinoic acid receptor responder protein 2 OS=Homo sapiens GN=RARRES2 PE=1 SV=1
Q9H4M9	EHD1_HUMAN	49.98	1	1	0.0930233	0.121212	0	0.0232558		60627	EH domain-containing protein 1 OS=Homo sapiens GN=EHD1 PE=1 SV=2
P04431	KV123_HUMAN	49.8	1	1	0.372093	0	1.6	0.0232558	Deamidation only N	14069	Ig kappa chain V-I region Walker OS=Homo sapiens PE=4 SV=1
O95416	SOX14_HUMAN	49.41	1	1	0.186047	0	0.8	0.0232558		26485	Transcription factor SOX-14 OS=Homo sapiens GN=SOX14 PE=2 SV=1
P41222	PTGDS_HUMAN	49.14	1	1	0.186047	0	0.8	0.0232558		21029	Prostaglandin-H2 D-isomerase OS=Homo sapiens GN=PTGDS PE=1 SV=1
Q9BZZ2	SN_HUMAN	49.01	1	1	0.0232558	0	0.1	0.0232558		182623	Sialoadhesin OS=Homo sapiens GN=SIGLEC1 PE=1 SV=2
P37840	SYUA_HUMAN	48.93	1	1	0.139535	0	0.6	0.0232558		14460	Alpha-synuclein OS=Homo sapiens GN=SNCA PE=1 SV=1
Q16143	SYUB_HUMAN	48.93	1	1	0.162791	0	0.7	0.0232558		14288	Beta-synuclein OS=Homo sapiens GN=SNCB PE=1 SV=1
Q8N568	DCLK2_HUMAN	48.84	1	1	0.0232558	0.030303	0	0.0232558		83606	Serine/threonine-protein kinase DCLK2 OS=Homo sapiens GN=DCLK2 PE=2 SV=4
P04438	HV208_HUMAN	48.78	1	1	0.116279	0.151515	0	0.0232558		16323	Ig heavy chain V-II region SESS OS=Homo sapiens PE=2 SV=1
P01814	HV201_HUMAN	48.78	1	1	0.139535	0.181818	0	0.0232558		14276	Ig heavy chain V-II region OU OS=Homo sapiens PE=1 SV=1
Q96KN2	CNDP1_HUMAN	48.65	1	1	0.0930233	0.121212	0	0.0465116		56706	Beta-Ala-His dipeptidase OS=Homo sapiens GN=CNDP1 PE=1 SV=4
Q149N8	SHPRH_HUMAN	48.47	1	1	0.0232558	0.030303	0	0.0232558		193078	E3 ubiquitin-protein ligase SHPRH OS=Homo sapiens GN=SHPRH PE=1 SV=2
O95497	VNN1_HUMAN	48.42	1	1	0.0697674	0.0909091	0	0.0232558	Deamidation only N	57012	Pantetheinase OS=Homo sapiens GN=VNN1 PE=1 SV=2
Q5D862	FILA2_HUMAN	47.95	1	1	0.0232558	0	0.1	0.0232558		248072	Filaggrin-2 OS=Homo sapiens GN=FLG2 PE=1 SV=1
P22614	SAA3_HUMAN	47.79	1	1	0.162791	0	0.7	0.0232558		13440	Putative serum amyloid A-3 protein OS=Homo sapiens GN=SAA3P PE=5 SV=1
Q7LGC8	CHST3_HUMAN	47.71	1	1	0.0697674	0.0909091	0	0.0232558	Oxidation (M)	54706	Carbohydrate sulfotransferase 3 OS=Homo sapiens GN=CHST3 PE=1 SV=3
P19367	HXK1_HUMAN	47.58	1	1	0.0232558	0.030303	0	0.0232558		102486	Hexokinase-1 OS=Homo sapiens GN=HK1 PE=1 SV=3
Q2TB90	HKDC1_HUMAN	47.58	1	1	0.0232558	0.030303	0	0.0232558		102545	Putative hexokinase HKDC1 OS=Homo sapiens GN=HKDC1 PE=2 SV=3
P52790	HXK3_HUMAN	47.58	1	1	0.0232558	0.030303	0	0.0232558		99025	Hexokinase-3 OS=Homo sapiens GN=HK3 PE=1 SV=2
Q8TDD1	DDX54_HUMAN	47.47	1	1	0.0232558	0.030303	0	0.0232558		98595	ATP-dependent RNA helicase DDX54 OS=Homo sapiens GN=DDX54 PE=1 SV=2
P48059	LIMS1_HUMAN	47.43	1	1	0.0697674	0.0909091	0	0.0232558	Carbamidomethylation	37251	LIM and senescent cell antigen-like-containing domain protein 1 OS=Homo sapiens GN=LIMS1 PE=1 SV=4
Q7Z4I7	LIMS2_HUMAN	47.43	1	1	0.0697674	0.0909091	0	0.0232558	Carbamidomethylation	38916	LIM and senescent cell antigen-like-containing domain protein 2 OS=Homo sapiens GN=LIMS2 PE=1 SV=1
O60641	AP180_HUMAN	47.03	1	1	0.0465116	0.0606061	0	0.0232558		92502	Clathrin coat assembly protein AP180 OS=Homo sapiens GN=SNAP91 PE=1 SV=2
Q9HCE0	EPG5_HUMAN	46.99	1	1	0.0232558	0.030303	0	0.0232558	Carbamidomethylation	292479	Ectopic P granules protein 5 homolog OS=Homo sapiens GN=EPG5 PE=2 SV=2
Q6EMK4	VASN_HUMAN	46.73	1	1	0.0465116	0.0606061	0	0.0232558		71713	Vasorin OS=Homo sapiens GN=VASN PE=1 SV=1
P11169	GTR3_HUMAN	46.35	1	1	0.0930233	0	0.4	0.0232558		53924	Solute carrier family 2 facilitated glucose transporter member 3 OS=Homo sapiens GN=SLC2A3 PE=1 SV=1
