# Supplementary material for: Plasma Proteomic Variables Related to COVID-19 Severity: An Untargeted nLC-MS/MS Investigation
Source: Int J Mol Sci. 2023 Feb 10;24(4):3570. doi: 10.3390/ijms24043570 (PMC9962231; doi:10.3390/ijms24043570)
Supplement: Supplementary file 1 [file ijms-24-03570-s001.zip › TABLE S2.xlsx]

## Sheet: caption of table S2
Table S2: List of the 29 DEPs comparing COVID-19 patients with Severe or Mild symptoms. Table with the list of the 17 proteins up-regulated in SEVEREs (in green) and the 12 proteins up-expressed in MILDs (in orange) in relation to their gene ID /Uniprot ID, the average mass, their coverage considering all the patients, the number of peptides and unique peptides identified in all the analysis and,…

## Sheet: Suppl Table 2
Uniprot_ID	Gene_ID	Description	Avg. Mass	Coverage (%)	#Peptides	#Unique	fold change	p_value
A1AG1	ORM1	Alpha-1-acid glycoprotein 1	23512	68	22	16	-2,5	0,005	UP in SEVEREs
A2GL	LRG1	Leucine-rich alpha-2-glycoprotein	38178	73	20	20	-1,7	0,033
AACT	SERPINA3	Alpha-1-antichymotrypsin	47651	54	26	26	-2,4	0,010
CO2	C2	Complement C2	83268	33	18	18	-5,6	0,001
CRP	CRP	C-reactive protein	25039	16	3	3	-2,5	0,024
FCN3	FCN3	Ficolin-3	32903	29	8	8	-1,5	0,010
HPT	HP	Haptoglobin	45205	87	60	35	-2,0	0,005
HV102	IGHV1-46	Ig heavy chain V-I region HG3	12946	22	2	2	-4,2	0,034
IGJ	JCHAIN	Immunoglobulin J chain	18099	79	25	25	-1,7	0,009
IGLL5	IGLL5	Immunoglobulin lambda-like polypeptide 5	23063	51	14	5	-1,5	0,031
KV307	IGKV3-20	Ig kappa chain V-III region GOL	11830	69	6	2	-1,7	0,026
KV309	IGKV3-11	Ig kappa chain V-III region VG (Fragment)	12575	32	3	3	-1,5	0,020
LAC2	IGLC2	Ig lambda-2 chain C regions	11294	96	17	5	-1,8	0,011
LV301	IGLV3-19	Ig lambda chain V-III region SH	11393	62	3	3	-1,7	0,037
LV302	IGLV3-21	Ig lambda chain V-III region LOI	11935	46	4	4	-1,5	0,021
SAA	SAA1 / SAA2	Serum amyloid A protein	13532	79	11	11	-6,3	0,005
VTNC	VTN	Vitronectin	54306	43	27	27	-1,5	0,023
FETUA	AHSG	Alpha-2-HS-glycoprotein	39325	70	33	33	1,9	0,001	UP in MILDs
FETUB	FETUB	Fetuin-B	42055	31	8	8	2,0	0,018
FHR4	CFHR4	Complement factor H-related protein 4	37299	11	3	2	2,0	0,019
FHR5	CFHR5	Complement factor H-related protein 5	64420	22	9	8	1,5	0,009
FLNA	FLNA	Filamin-A	280737	38	72	71	2,1	0,031
GELS	GSN	Gelsolin	85697	63	41	41	1,9	0,005
GPIX	GP9	Platelet glycoprotein IX	19046	23	3	3	1,8	0,038
HRG	HRG	Histidine-rich glycoprotein	59578	48	31	31	2,2	0,003
ITB3	ITGB3	Integrin beta-3	87058	41	25	25	2,2	0,049
LUM	LUM	Lumican	38429	15	6	6	1,8	0,014
MYL6	MYL6	Myosin light polypeptide 6	16930	64	9	9	1,8	0,046
RAB1A	RAB1A	Ras-related protein Rab-1A	22678	16	2	2	1,7	0,037
