# Supplementary material for: Plasma Proteomic Variables Related to COVID-19 Severity: An Untargeted nLC-MS/MS Investigation
Source: Int J Mol Sci. 2023 Feb 10;24(4):3570. doi: 10.3390/ijms24043570 (PMC9962231; doi:10.3390/ijms24043570)
Supplement: Supplementary file 1 [file ijms-24-03570-s001.zip › TABLE S4.xlsx]

## Sheet: caption of table S4
Table S4: Biological processes enriched in SEVEREs. The table has been extrapolated from STRING [59] and shows the biological processes (BP) of the proteins which are up-regulated in patients with severe symptoms. observed gene count= number of UP-regulated proteins in MILDs matched in the BP; background gene count = number of total genes for the specific BP.

## Sheet: Suppl Table 4
#term ID	term description	observed gene count	background gene count	strength	false discovery rate	matching proteins in your network (labels)
GO:0006953	Acute-phase response	6	44	2.35	2.39e-09	CRP,ORM1,HP,GIG25,SAA1,SAA2
GO:0006955	Immune response	11	1588	1.05	4.97e-08	VTN,IGJ,CRP,ORM1,FCN3,C2,LRG1,HP,GIG25,SAA1,IGLL5
GO:0006952	Defense response	10	1296	1.1	3.16e-07	IGJ,CRP,ORM1,FCN3,C2,HP,GIG25,SAA1,IGLL5,SAA2
GO:0016192	Vesicle-mediated transport	10	1805	0.96	5.44e-06	VTN,IGJ,CRP,ORM1,FCN3,LRG1,HP,GIG25,SAA1,IGLL5
GO:0002252	Immune effector process	8	969	1.13	2.84e-05	CRP,ORM1,FCN3,C2,LRG1,HP,GIG25,IGLL5
GO:0002443	Leukocyte mediated immunity	7	641	1.25	4.64e-05	CRP,ORM1,C2,LRG1,HP,GIG25,IGLL5
GO:0006956	Complement activation	4	54	2.08	4.81e-05	CRP,FCN3,C2,IGLL5
GO:0006897	Endocytosis	6	433	1.35	0.00013	VTN,IGJ,FCN3,HP,SAA1,IGLL5
GO:0051707	Response to other organism	8	1256	1.02	0.00014	IGJ,CRP,FCN3,C2,LRG1,HP,SAA1,IGLL5
GO:0098542	Defense response to other organism	7	900	1.1	0.00026	IGJ,CRP,FCN3,C2,HP,SAA1,IGLL5
GO:0006959	Humoral immune response	5	275	1.47	0.00034	IGJ,CRP,FCN3,C2,IGLL5
GO:0009605	Response to external stimulus	9	2310	0.8	0.00054	IGJ,CRP,FCN3,C2,LRG1,HP,SAA1,IGLL5,SAA2
GO:0045087	Innate immune response	6	703	1.14	0.0011	IGJ,CRP,FCN3,C2,SAA1,IGLL5
GO:0006958	Complement activation, classical pathway	3	38	2.11	0.0012	CRP,C2,IGLL5
GO:0006898	Receptor-mediated endocytosis	4	184	1.55	0.0021	IGJ,HP,SAA1,IGLL5
GO:0030449	Regulation of complement activation	3	56	1.94	0.003	VTN,C2,IGLL5
GO:0051179	Localization	11	5591	0.51	0.0048	VTN,IGJ,CRP,ORM1,FCN3,LRG1,HP,GIG25,SAA1,IGLL5,SAA2
GO:0042742	Defense response to bacterium	4	277	1.37	0.008	IGJ,CRP,HP,IGLL5
GO:0009617	Response to bacterium	5	634	1.11	0.0094	IGJ,CRP,LRG1,HP,IGLL5
GO:0050896	Response to stimulus	12	8046	0.39	0.0094	VTN,IGJ,CRP,ORM1,FCN3,C2,LRG1,HP,GIG25,SAA1,IGLL5,SAA2
GO:0002250	Adaptive immune response	4	317	1.31	0.012	IGJ,CRP,C2,IGLL5
GO:0006910	Phagocytosis, recognition	2	20	2.21	0.0282	FCN3,IGLL5
GO:0016477	Cell migration	5	896	0.96	0.0406	VTN,IGJ,SAA1,IGLL5,SAA2
GO:0048584	Positive regulation of response to stimulus	7	2257	0.7	0.0406	VTN,CRP,FCN3,C2,LRG1,SAA1,IGLL5
GO:0050776	Regulation of immune response	5	896	0.96	0.0406	VTN,CRP,FCN3,C2,IGLL5
GO:0002682	Regulation of immune system process	6	1514	0.81	0.0407	VTN,CRP,ORM1,FCN3,C2,IGLL5
GO:0043312	Neutrophil degranulation	4	484	1.13	0.0481	ORM1,LRG1,HP,GIG25
