# Supplementary material for: Plasma Proteomic Variables Related to COVID-19 Severity: An Untargeted nLC-MS/MS Investigation
Source: Int J Mol Sci. 2023 Feb 10;24(4):3570. doi: 10.3390/ijms24043570 (PMC9962231; doi:10.3390/ijms24043570)
Supplement: Supplementary file 1 [file ijms-24-03570-s001.zip › TABLE S5.xlsx]

## Sheet: caption of table S5
Table S5: Biological processes enriched in MILDs. The table has been extrapolated from STRING [59] and shows the biological processes (BP) of the proteins which are up-regulated in patients with mild symptoms. observed gene count= number of UP-regulated proteins in MILDs matched in the BP; background gene count = number of total genes for the specific BP.

## Sheet: Suppl Table 5
#term ID	term description	observed gene count	background gene count	strength	false discovery rate	matching proteins in your network (labels)
GO:0002576	Platelet degranulation	4	129	1.7	0.0124	HRG,FLNA,AHSG,ITGB3
GO:0030168	Platelet activation	4	135	1.68	0.0124	HRG,GP9,FLNA,ITGB3
GO:0032940	Secretion by cell	6	979	1	0.0487	HRG,FLNA,GSN,RAB1A,AHSG,ITGB3
GO:0001775	Cell activation	6	1075	0.96	0.0498	HRG,GP9,FLNA,GSN,AHSG,ITGB3
GO:0045055	Regulated exocytosis	5	697	1.07	0.0498	HRG,FLNA,GSN,AHSG,ITGB3
GO:0051838	Cytolysis by host of symbiont cells	2	14	2.37	0.0498	HRG,CFHR5
