# Supplementary material for: Plasma Proteomic Variables Related to COVID-19 Severity: An Untargeted nLC-MS/MS Investigation
Source: Int J Mol Sci. 2023 Feb 10;24(4):3570. doi: 10.3390/ijms24043570 (PMC9962231; doi:10.3390/ijms24043570)
Supplement: Supplementary file 1 [file ijms-24-03570-s001.zip › TABLE S7.xlsx]

## Sheet: caption of table S7
Table S7: Clinical description of the cohort used for the study- #infection: sample collection performed within 21 days from the first positive swab test (patients with negative test excluded); #post-infection: sample collection performed after 21 days from the first positive swab test (or with negative test)

## Sheet: Suppl Table 7
	Disease at collection (MILDs/SEVEREs)	Clinical ID	Proteomic ID	WHO SCORE at sampling	Sex	Age	Disease stage	Date of first positive swab	Date of sample collection	Co-morbidities	COVID symptoms	Pneumonia	WBC (x109/L)	Lymphocytes	Treatments
															Steroids	Anti-IL1	Anti-IL6	Remdesivir
	MILDs	PMI-0018	1	1	M	27	post infection	2020-03-20	2020-06-17	Fabry disease	fever, cough, dispnea	no	4570	1.33	no	no	no	no
	MILDs	PMI-0019	2	1	M	41	post infection	2020-05-01	2020-06-17	none	fever, cough	no	2.99	1.03	no	no	no	yes
	MILDs	PMI-0021	3	1	F	76	post infection	2020-04-01	2020-06-17	hypertension, diabetes	fever, cough	yes	4.55	1.35	yes	no	no	no
	MILDs	PMI-0017	4	1	M	47	post infection	2020-04-15	2020-06-17	renal transplant	fever	no	7.29	1.82	no	no	no	no
	MILDs	PMI-0020	5	1	M	72	post infection	2020-03-24	2020-06-17	N/A	N/A	no	4.66	1.26	N/A	N/A	N/A	N/A
	MILDs	PMI-0027	6	1	F	35	post infection	2020-08-01	2020-08-19	none	none	no	6.82	2.09	N/A	N/A	N/A	N/A
	MILDs	PMI-0028	7	1	F	33	post infection	2020-08-14	2020-09-02	none	cough, fever, pharyngodynia, ageusia, anosmia	no	7.45	2.95	N/A	N/A	N/A	N/A
	MILDs	PMI-0030	8	1	M	45	post infection	2020-08-07	2020-09-09	diabetes, obesity	fever, cough, dyspnea, respiratory failure	yes	7.18	4.03	yes	no	no	no
	MILDs	PMI-0029	9	1	F	22	infection	2020-08-24	2020-09-09	asthma	fever, cough, headache	no	5.10	2.10	N/A	N/A	N/A	N/A
	MILDs	PMI-0032	10	1	F	29	post infection	2020-08-23	2020-09-16	none	fever,pharyngodynia	no	5.63	2.16	no	no	no	no
	MILDs	PMI-0031	11	1	M	77	infection	2020-08-27	2020-09-11	tubercolosis	fever, fatigue, anosmia	no	6.00	1.54	no	no	no	no
	MILDs	PMI-0037	18	1	M	57	infection	2020-09-29	2020-10-01	Cystic fibrosis	fever, cough, sputum	no	6.23	1.71	yes	no	no	yes
	MILDs	PMI-0038	19	1	F	43	Infection	2020-09-21	2020-09-28	none	fever, cough, nausea	yes	N/A	N/A	no	no	no	no
	MILDs	PMI-0058	36	1	F	56	infection	2020-10-19	2020-11-01	N/A	N/A	N/A	7.45	0.78	no	no	no	no
	MILDs	PMI-0059	37	1	F	57	infection	2020-10-18	2020-11-01	N/A	N/A	N/A	5.50	1.60	no	no	no	no
	MILDs	PMI-0064	38	1	F	29	infection	2020-10-26	2020-11-06	N/A	N/A	N/A	8.20	2.10	no	no	no	no
	MILDs	PMI-0065	39	1	M	42	post infection	2020-10-22	2020-11-06	none	fever, asthenia, cough, myalgia	no	7.36	2.34	no	no	no	no
	MILDs	PMI-0067	40	1	M	52	post infection	2020-10-28	2020-11-09	none	fever, cough, asthenia	yes	7.64	2.74	yes	no	no	no
	MILDs	PMI-0069	41	1	M	63	post infection	2020-10-28	2020-11-12	hypertension, dyslipidemia, arteriopathy	fever, cough, asthenia	yes	N/A	N/A	no	no	no	no
	MILDs	PMI-0073	43	1	F	43	infection	2020-10-29	2020-11-13	hypertension	fever, cough, asthenia	yes	16.37	2.74	yes	no	no	no
	MILDs	PMI-0074	44	1	M	47	infection	2020-10-31	2020-11-13	asthma	fever	yes	10.12	1.58	no	no	no	no
	MILDs	PMI-0081	47	1	M	48	post infection	2020-11-09	2020-11-23	N/A	N/A	no	7.66	2.08	no	no	no	no
	MILDs	PMI-0082	48	1	M	38	post infection	2020-11-10	2020-11-23	N/A	N/A	no	6.70	1.61	no	no	no	no
	MILDs	PMI-0083	49	1	M	62	post infection	2020-11-10	2020-11-23	N/A	N/A	no	7.96	1.95	no	no	no	no
	MILDs	PMI-0084	50	1	M	67	infection	2020-11-09	2020-11-24	hypertension	fever, myalgia	no	8.27	1.27	no	no	no	no
	MILDs	PMI-0085	51	1	F	59	post infection	2020-11-09	2020-11-24	hypothyroidism	fever, cough, headache	no	7.22	2.03	no	no	no	no
	MILDs	PMI-0086	52	1	M	61	post infection	2020-11-10	2020-11-25	N/A	N/A	no	9.65	1.37	no	no	no	no
	MILDs	PMI-0087	53	1	F	57	post infection	2020-11-19	2020-11-27	N/A	N/A	no	6.64	1.42	no	no	no	no
	MILDs	PMI-0088	54	1	M	60	post-infection	2020-10-18	2020-11-30	none	fever, dyspnea, diarrhea	yes	10.85	0.49	yes	no	no	no
	MILDs	PMI-0089	55	1	F	29	infection	2020-11-18	2020-12-01	none	ageusia, anosmia, dyspnea	no	5.45	1.70	no	no	no	no
	MILDs	PMI-0090	56	1	F	35	post infection	2020-11-21	2020-12-02	N/A	N/A	no	7.28	2.25	no	no	no	no
	MILDs	PMI-0091	57	1	F	29	post infection	2020-11-19	2020-12-03	N/A	N/A	no	6.28	2.55	no	no	no	no
	MILDs	PMI-0092	58	1	F	63	post infection	2020-11-19	2020-12-03	N/A	N/A	no	N/A	N/A	no	no	no	no
	SEVEREs	PMI-0033	12	4	M	61	N/A	2020-09-14	Missing value	hypertension	fever, cough, dyspnea, respiratory failure	yes	2.48	0.83	yes	no	no	yes
	SEVEREs	PMI-0034	13	4	F	68	infection	2020-09-15	2020-09-29	Hyperthyroidism., Budd-Chiari syndrome, polycythemia vera, myelofibrosis, hysterectomy	fever, dyspnea, cough	yes	6.69	1	yes	no	no	yes
	SEVEREs	PMI-0036	16	5	F	50	N/A	2020-09-11	Missing value	asthma	fever, asthenia, tremors, dyspnea, pharyngodynia, ageusia, anosmia, diarrhea, nausea, vomiting, conjunctivitis	yes	10.2	0.84	yes	no	no	yes
	SEVEREs	PMI-0035	20	4	F	25	infection	2020-09-20	2020-09-28	none	cough, ageusia, anosmia, dyspnea	yes	5.1	2.3	yes	no	no	no
	SEVEREs	PMI-0039	25	5	M	65	infection	2020-10-07	2020-10-13	hypertension	dyspnea, fever	yes	6.20	0.98	yes	no	no	no
	SEVEREs	PMI-0042	28	5	M	67	infection	2020-10-10	2020-10-23	none	fever, cough	yes	N/A	N/A	yes	no	no	no
	SEVEREs	PMI-0045	31	5	M	83	infection	2020-10-14	2020-10-26	N/A	fever, cough	yes	8.28	1.17	yes	no	no	no
	SEVEREs	PMI-0051	33	4	F	58	infection	2020-10-16	2020-10-30	none	fever, dyspnea	yes	26.06	1.83	yes	no	no	no
	SEVEREs	PMI-0071	42	5	M	66	infection	2020-11-10	2020-11-13	Chronic obstructive pulmonary disease	fever, cough, dyspnea	yes	11.3	1.14	yes	no	no	no
	SEVEREs	PMI-0078	46	4	M	77	infection	2020-11-01	2020-11-17	hypertension, IPB	fever, cough, dyspnea	yes	N/A	N/A	yes	no	no	no
